# Supplementary material for: The essential Rhodobacter sphaeroides CenKR two-component system regulates cell division and envelope biosynthesis
Source: PubMed Central journal article supplement (PMC9275681; doi:10.1371/journal.pgen.1010270), 2022-06-29

A

| Kinase  | Predicted Regulator | Probability |
|---------|---------------------|-------------|
| RSP1056 | RSP0847             | 0.80122     |
| RSP1056 | RSP1274             | 0.14385     |
| RSP1056 | RSP1083             | 0.05493     |

| Regulator | Predicted Kinase | Probability |
|-----------|------------------|-------------|
| RSP0847   | RSP1056          | 0.80122     |
| RSP0847   | RSP3217          | 0.00046     |
| RSP0847   | RSP0491          | 0.00013     |

B

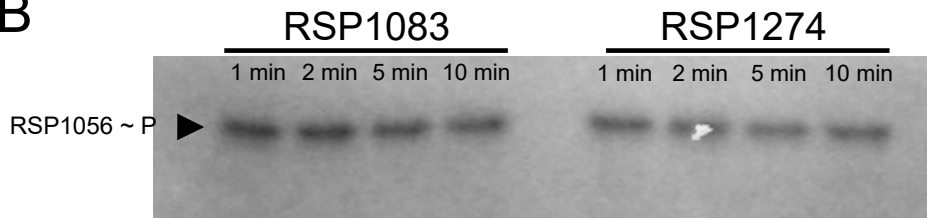

Supplement: pgen.1010270.s001.pdf [file pgen.1010270.s001.pdf]
