# Supplementary material for: The essential Rhodobacter sphaeroides CenKR two-component system regulates cell division and envelope biosynthesis
Source: PubMed Central journal article supplement (PMC9275681; doi:10.1371/journal.pgen.1010270), 2022-06-29

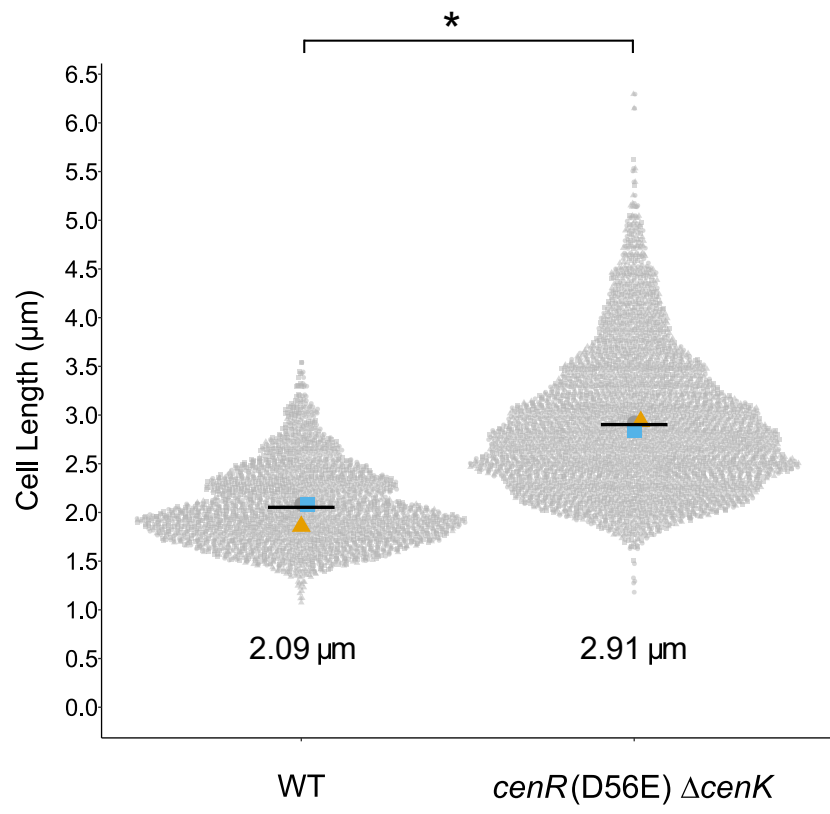

Supplement: pgen.1010270.s004.pdf [file pgen.1010270.s004.pdf]
