# Supplementary material for: The essential Rhodobacter sphaeroides CenKR two-component system regulates cell division and envelope biosynthesis
Source: PubMed Central journal article supplement (PMC9275681; doi:10.1371/journal.pgen.1010270), 2022-06-29

*tolQRAB*      *rpoH1*      *RSP\_2157*

CenK~P:      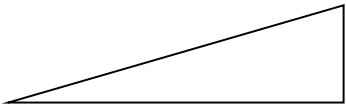            

Lane:      1   2   3   4   5      6   7   8   9   10      11   12   13   14   15

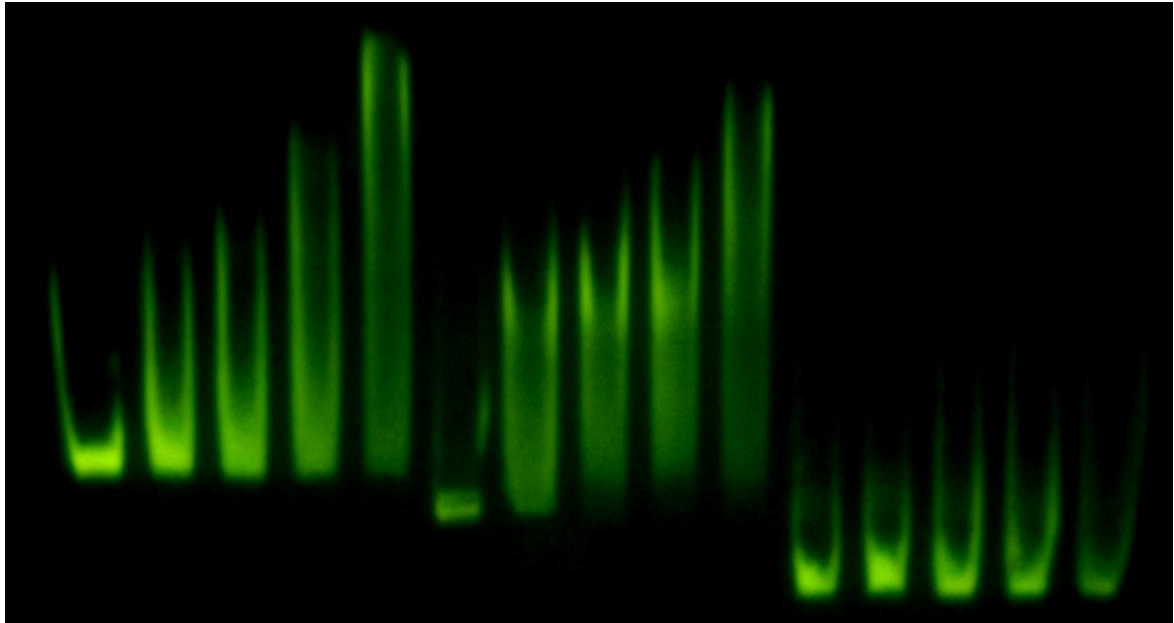

Supplement: pgen.1010270.s005.pdf [file pgen.1010270.s005.pdf]
