# Supplementary material for: The essential Rhodobacter sphaeroides CenKR two-component system regulates cell division and envelope biosynthesis
Source: PubMed Central journal article supplement (PMC9275681; doi:10.1371/journal.pgen.1010270), 2022-06-29
Supplement: pgen.1010270.s007.pdf [file pgen.1010270.s007.pdf]

| CENTER OF PEAK (bp) <sup>a</sup> | ChIP-seq FOLD ENRICHMENT (IP/INPUT)                                     |      |       |      | DOWNSTREAM GENE |           |                                                                 | Transmembrane Domain(s) <sup>b</sup> | Signal Peptide <sup>c</sup> | Sequence Logo Predicted DNA-binding motif: TGA-N8-TGA | TRANSCRIPT FOLD CHANGE (log <sub>2</sub> ) <sup>d</sup> |         |         |         |            | REGULATORY ROLE <sup>e</sup> | Essential <sup>f</sup> |     |
|----------------------------------|-------------------------------------------------------------------------|------|-------|------|-----------------|-----------|-----------------------------------------------------------------|--------------------------------------|-----------------------------|-------------------------------------------------------|---------------------------------------------------------|---------|---------|---------|------------|------------------------------|------------------------|-----|
|                                  | D56E                                                                    | WT   | AcenK | D56A | ID              | GENE NAME | ANNOTATION                                                      |                                      |                             |                                                       | cenR(D56E)                                              | FDR     | AcenK   | FDR     | cenR(D56A) |                              |                        | FDR |
|                                  | <b>Cell envelope, transport, and extracytoplasmic targeted proteins</b> |      |       |      |                 |           |                                                                 |                                      |                             |                                                       |                                                         |         |         |         |            |                              |                        |     |
| 2597500                          | 1.4                                                                     | --   | --    | --   | RSP_0847        | RSP_0847  | two component transcriptional regulator winged helix family     | N                                    | N                           | ACACAGCCCTTAG                                         | ▲ 0.49                                                  | 9.1E-07 | ▼ -5.16 | 5.9E-07 | ▼ -4.34    | 1.1E-06                      | +                      | Y   |
| 2413901                          | 4.5                                                                     | 3.2  | 1.6   | 1.6  | RSP_0672        | tolQ      | Cell division and transport-associated protein TolQ             | N                                    | N                           | TGACCCAGATCTTT                                        | ▲ 2.51                                                  | 2.3E-03 | ▼ -0.58 | 6.7E-03 | n.s.       | n.s.                         | +                      | Y   |
| 392575                           | 3.8                                                                     | 1.7  | --    | --   | RSP_1807        | RSP_1807  | putative secreted protein                                       | N                                    | Y                           | TCCCAAAAACCTTAT                                       | ▲ 2.72                                                  | 4.1E-06 | ▼ -2.04 | 1.4E-04 | ▼ -1.97    | 8.0E-05                      | +                      | N   |
| 426084                           | 2.8                                                                     | 2.3  | --    | --   | RSP_1834        | RSP_1834  | Beta-lactamase superfamily                                      | N                                    | Y                           | TGCACCCAGCTGTAA                                       | ▲ 2.47                                                  | 4.4E-06 | ▼ -5.56 | 1.7E-05 | ▼ -5.43    | 2.8E-07                      | +                      | N   |
| 2970115                          | 2.9                                                                     | 2.2  | --    | --   | RSP_1199        | RSP_1199  | L,D-transpeptidases/carboxypeptidases                           | N                                    | Y                           | TGACCCAGGGCTTAA                                       | ▲ 2.47                                                  | 4.4E-05 | ▼ -1.98 | 9.9E-05 | ▼ -1.39    | 5.1E-04                      | +                      | N   |
| 2970115*                         | 2.9*                                                                    | 2.2* | --    | --   | RSP_1200        | RSP_1200  | uncharacterized protein with SCP/PR1 domains                    | Y                                    | Y                           | TGAGTTCATTAT                                          | ▲ 0.52                                                  | 1.6E-05 | ▼ -0.52 | 3.7E-03 | n.s.       | n.s.                         | +                      | N   |
| 478200                           | 2.0                                                                     | 1.6  | --    | --   | RSP_1880        | RSP_1880  | peptidoglycan-binding domain-containing protein                 | N                                    | Y                           | TCACATGCCTCTTT                                        | ▼ -1.80                                                 | 4.6E-06 | ▲ 1.24  | 5.3E-03 | n.s.       | n.s.                         | -                      | N   |
| 2933000                          | 1.8                                                                     | 1.4  | --    | --   | RSP_1168        | surA      | PpiC-type peptidyl-prolyl cis-trans isomerase                   | N                                    | Y                           | TCACATGATCTGTG                                        | ▲ 3.40                                                  | 2.8E-06 | ▼ -1.48 | 9.1E-04 | ▼ -0.74    | 1.1E-02                      | +                      | N   |
| 2933000*                         | 1.8*                                                                    | 1.4* | --    | --   | RSP_1169        | secA      | protein translocase subunit secA                                | N                                    | Y                           | TCCGCCCAGCGTTCAG                                      | ▲ 1.80                                                  | 3.0E-06 | ▼ -0.94 | 1.7E-03 | n.s.       | n.s.                         | +                      | Y   |
| 435330                           | 2.0                                                                     | --   | --    | --   | RSP_1844        | RSP_1844  | putative periplasmic protein                                    | N                                    | Y                           | TGGCCAGGCTTCAG                                        | ▲ 1.25                                                  | 2.2E-05 | n.s.    | n.s.    | n.s.       | n.s.                         | +                      | N   |
| 1368770                          | 2.0                                                                     | --   | --    | --   | RSP_2718        | RSP_2718  | putative outer membrane protein                                 | Y                                    | Y                           | TGACCTCCTCTAG                                         | ▲ 3.09                                                  | 8.2E-04 | ▼ -4.76 | 5.9E-07 | ▼ -6.49    | 2.9E-07                      | +                      | N   |
| 2641460                          | 1.8                                                                     | --   | --    | --   | RSP_0890        | mIaC      | Intermembrane phospholipid transport system binding protein     | N                                    | Y                           | TCAATACTTGGTGA                                        | ▲ 2.47                                                  | 1.7E-03 | ▼ -0.74 | 2.2E-03 | ▼ -1.14    | 6.9E-04                      | +                      | N   |
| 2473818                          | 3.2                                                                     | 1.9  | --    | --   | RSP_0730        | RSP_0730  | TIGR02302 family protein                                        | Y                                    | N                           | TCCGCCTCCTTCAG                                        | ▲ 2.23                                                  | 2.0E-04 | ▼ -1.63 | 3.7E-04 | ▼ -0.63    | 1.5E-02                      | +                      | N   |
| 2450500                          | 2.0                                                                     | 1.4  | --    | --   | RSP_0704        | RSP_0704  | ABC peptide transporter substrate binding protein               | Y                                    | Y                           | TCCACCAATCGAC                                         | ▲ 1.77                                                  | 2.1E-05 | ▼ -0.62 | 4.0E-03 | n.s.       | n.s.                         | +                      | N   |
| 458700                           | 1.6                                                                     | 1.7  | --    | --   | RSP_1860        | RSP_1860  | cell wall hydrolyses involved in spore germination              | N                                    | Y                           | TGGCAAAAATTCAC                                        | ▲ 1.42                                                  | 2.1E-03 | ▼ -0.61 | 1.1E-02 | ▼ -1.25    | 6.6E-04                      | +                      | N   |
| 1458970                          | 1.6                                                                     | 1.6  | --    | 1.6  | RSP_2847        | RSP_2847  | putative lipoprotein (predicted lipid binding domain)           | Y                                    | Y                           | TCTCTCCGCCCTAC                                        | ▼ -1.20                                                 | 1.1E-03 | ▲ 0.97  | 2.7E-02 | n.s.       | n.s.                         | -                      | N   |
| 2665900                          | 1.5                                                                     | --   | --    | --   | RSP_0915        | RSP_0915  | putative periplasmic protein                                    | N                                    | Y                           | TACAAAATCTTAAG                                        | ▲ 1.43                                                  | 5.7E-04 | n.s.    | n.s.    | n.s.       | n.s.                         | +                      | N   |
| 606400                           | 1.6                                                                     | --   | --    | --   | RSP_2006        | RSP_2006  | uncharacterized protein involved in outer membrane biogenesis   | Y                                    | N                           | TCACCCCAATCCGAC                                       | ▲ 0.67                                                  | 7.9E-04 | n.s.    | n.s.    | n.s.       | n.s.                         | +                      | N   |
| 930800 (chr2)                    | 1.7                                                                     | 1.6  | --    | --   | RSP_1413        | RSP_1413  | TRAP-T family transporter periplasmic binding component         | Y                                    | Y                           | TCCACAAATCAATTG                                       | ▼ -1.34                                                 | 1.2E-02 | ▲ 0.89  | 5.8E-02 | n.s.       | n.s.                         | +                      | N   |
| 1207306                          | 2.7                                                                     | 1.8  | --    | 1.5  | RSP_2561        | exoP      | putative succinoglycan biosynthesis transport protein ExoP      | Y                                    | N                           | TCACATCCCTTCAG                                        | n.s.                                                    | n.s.    | n.s.    | n.s.    | ▼ -0.60    | 4.2E-02                      | +                      | N   |
| 278100                           | 1.7                                                                     | --   | --    | --   | RSP_1024        | RSP_1024  | Putative MoxR family protein                                    | Y                                    | N                           | TCACATCACTTCTG                                        | ▲ 0.85                                                  | 9.1E-05 | ▼ -0.56 | 6.1E-03 | ▼ -0.84    | 3.8E-03                      | +                      | N   |
| 2758300                          | 2.8                                                                     | 1.5  | --    | --   | RSP_1000        | dsbC      | Disulphide bond corrector protein DsbC                          | N                                    | Y                           | TGGCCAGTTCAG                                          | ▲ 2.48                                                  | 5.9E-06 | ▼ -1.64 | 1.9E-03 | ▼ -2.07    | 8.8E-05                      | +                      | N   |
| 2758300*                         | 2.8*                                                                    | 1.5* | --    | --   | RSP_0999        | RSP_0999  | putative transcriptional regulator                              | N                                    | N                           | TCCCCAGCTTCCAG                                        | ▲ 1.37                                                  | 4.5E-05 | n.s.    | n.s.    | n.s.       | n.s.                         | +                      | N   |
| 1273100                          | 1.6                                                                     | --   | --    | --   | RSP_2633        | ccmF      | Cytochrome c maturation protein CcmF                            | Y                                    | N                           | TGCAGGGGAAGGCAC                                       | ▲ 1.06                                                  | 3.2E-02 | ▼ -0.21 | 3.0E-02 | n.s.       | n.s.                         | +                      | Y   |
| 1330900                          | 2.2                                                                     | --   | --    | --   | RSP_2685        | cycH      | Putative cytochrome c-type biogenesis protein cycH              | Y                                    | N                           | TGCAGGGATATTGAT                                       | ▲ 0.79                                                  | 1.1E-04 | n.s.    | n.s.    | ▼ -0.89    | 1.6E-02                      | +                      | Y   |
| 1330900*                         | 2.2*                                                                    | --   | --    | --   | RSP_2686        | soxB      | putative sarcosine oxidase beta subunit                         | N                                    | N                           | TCCACATCCCTTCA                                        | ▲ 3.76                                                  | 6.0E-05 | ▼ -1.21 | 5.5E-04 | n.s.       | n.s.                         | +                      | N   |
| 51549                            | 1.9                                                                     | 1.5  | --    | --   | RSP_1465        | RSP_1465  | putative aminoglycoside phosphotransferase                      | N                                    | N                           | TCACCAATCTTAA                                         | ▲ 0.78                                                  | 4.5E-05 | ▼ -1.14 | 1.2E-03 | ▼ -1.42    | 1.6E-03                      | +                      | N   |
| 106900 (chr2)                    | 1.6                                                                     | --   | --    | --   | RSP_3067        | RSP_3067  | hypothetical protein                                            | Y                                    | N                           | TCACAGGATCTTGT                                        | ▲ 4.51                                                  | 1.9E-06 | n.s.    | n.s.    | ▼ -1.27    | 8.0E-03                      | +                      | N   |
| 84880                            | 2.5                                                                     | 1.6  | --    | --   | RSP_1496        | RSP_1496  | Lysosome-like putative lipoprotein                              | N                                    | Y                           | TCCCTTTTTTCTCAA                                       | ▲ 1.37                                                  | 1.3E-03 | n.s.    | n.s.    | n.s.       | n.s.                         | +                      | N   |
| 694770                           | 3.6                                                                     | 2.6  | 3.0   | 3.1  | RSP_2095        | mraZ      | Putative MraZ protein                                           | N                                    | N                           | TCACATCCCTTCAG                                        | ▼ -1.00                                                 | 8.0E-02 | n.s.    | n.s.    | n.s.       | n.s.                         | -                      | N   |
| 706700                           | 2.0                                                                     | 2.3  | 2.5   | 2.5  | RSP_2106        | ftsW      | cell division protein FtsW                                      | Y                                    | N                           | TCCACTTCAGTTCAG                                       | ▼ -2.25                                                 | 1.2E-03 | ▲ 1.18  | 1.3E-02 | ▲ 0.92     | 1.6E-03                      | -                      | Y   |
| 711700                           | 7.2                                                                     | 9.9  | 7.5   | 5.7  | RSP_2111        | ddlA      | D-alanine--D-alanine ligase                                     | N                                    | N                           | TCACATCCCTTCAG                                        | ▼ -1.06                                                 | 2.4E-03 | ▲ 1.57  | 3.6E-03 | ▲ 0.49     | 1.9E-02                      | -                      | Y   |
| 2889120                          | 2.6                                                                     | 1.8  | --    | --   | RSP_1125        | mtlB      | Membrane bound lytic murein transglycosylase B                  | N                                    | Y                           | TCCACTTCAGTTCAG                                       | ▲ 1.98                                                  | 6.5E-06 | n.s.    | n.s.    | n.s.       | n.s.                         | +                      | N   |
| 2430800                          | 1.6                                                                     | 1.7  | 2.1   | 1.8  | RSP_0688        | dacC      | D-alanyl-D-alanine carboxypeptidase                             | Y                                    | Y                           | TCCACTTCAGTTCAG                                       | ▼ -0.96                                                 | 3.2E-03 | ▲ 1.09  | 1.5E-02 | ▲ 0.49     | 2.0E-02                      | -                      | Y   |
| 1622411                          | 2.3                                                                     | 2.4  | 2.7   | 2.7  | RSP_2942        | RSP_2942  | sporulation and cell division-related protein                   | Y                                    | N                           | TCACATCCCTTCAG                                        | ▼ -0.53                                                 | 1.4E-03 | ▲ 1.55  | 8.0E-03 | ▲ 0.83     | 3.2E-03                      | -                      | Y   |
| 239600 (chr2)                    | 1.5                                                                     | 1.8  | 1.7   | 1.7  | RSP_3186        | RSP_3186  | putative transmembrane protein                                  | Y                                    | N                           | TCACATCCCTTCAG                                        | ▼ -1.42                                                 | 2.3E-02 | n.s.    | n.s.    | n.s.       | n.s.                         | -                      | N   |
| 1360340                          | 1.7                                                                     | 1.8  | 1.6   | 1.6  | RSP_2711        | RSP_2711  | Beta-barrel assembly machine subunit BamA                       | Y                                    | Y                           | TCACATCCCTTCAG                                        | ▼ -0.42                                                 | 3.7E-02 | n.s.    | n.s.    | n.s.       | n.s.                         | -                      | Y   |
| 1184160                          | 2.3                                                                     | 1.8  | 1.7   | 1.7  | RSP_2540        | tatA      | twin-arginine translocation system protein TatA                 | Y                                    | N                           | TCACATCCCTTCAG                                        | ▲ 1.96                                                  | 4.3E-03 | ▼ -0.43 | 1.1E-02 | n.s.       | n.s.                         | +                      | N   |
| 1193700                          | 1.6                                                                     | --   | --    | --   | RSP_2549        | exoQ      | putative polysaccharide polymerase                              | N                                    | N                           | TCCACTTCAGTTCAG                                       | ▲ 1.04                                                  | 9.9E-03 | n.s.    | n.s.    | n.s.       | n.s.                         | +                      | N   |
| 1190291                          | 2.5                                                                     | 3.1  | 2.9   | 2.9  | RSP_2547        | exoY      | exopolysaccharide production protein exoY                       | Y                                    | N                           | TCACATCCCTTCAG                                        | ▲ 1.26                                                  | 5.3E-03 | n.s.    | n.s.    | ▼ -1.04    | 2.8E-03                      | +                      | N   |
| 1426500                          | 2.1                                                                     | 3.2  | 2.5   | 2.2  | RSP_2778        | RSP_2778  | Invasion protein B involved in pathogenesis                     | N                                    | Y                           | TCACATCCCTTCAG                                        | ▲ 0.55                                                  | 8.3E-03 | ▼ -0.29 | 1.3E-02 | n.s.       | n.s.                         | +                      | N   |
| 1670913                          | 2.6                                                                     | 2.4  | --    | --   | RSP_2980        | aspAT     | Putative aspartate aminotransferase A                           | N                                    | N                           | TCACATCCCTTCAG                                        | ▼ -1.44                                                 | 7.1E-03 | n.s.    | n.s.    | n.s.       | n.s.                         | +                      | N   |
| 1670913*                         | 2.6*                                                                    | 2.4* | --    | --   | RSP_2981        | RSP_2981  | Putative protein-disulfide isomerase                            | N                                    | Y                           | TCACATCCCTTCAG                                        | ▲ 2.25                                                  | 3.0E-06 | ▼ -1.42 | 6.0E-04 | ▼ -0.60    | 5.0E-02                      | +                      | N   |
| 889240                           | 2.5                                                                     | 2.1  | --    | --   | RSP_2271        | RSP_2271  | putative lipoprotein                                            | N                                    | Y                           | TCACATCCCTTCAG                                        | ▲ 1.64                                                  | 2.8E-02 | ▼ -0.84 | 7.2E-03 | n.s.       | n.s.                         | +                      | N   |
| 2682500                          | 1.8                                                                     | --   | --    | --   | RSP_0932        | ctpA      | Peptidase family S41                                            | Y                                    | Y                           | TCACATCCCTTCAG                                        | ▲ 1.54                                                  | 7.0E-05 | ▼ -0.35 | 1.7E-02 | n.s.       | n.s.                         | +                      | N   |
| 2856500                          | 1.9                                                                     | 1.5  | --    | --   | RSP_1097        | pqqL      | putative zinc protease                                          | N                                    | Y                           | TCACATCCCTTCAG                                        | ▲ 3.36                                                  | 1.8E-05 | ▼ -1.15 | 3.5E-03 | ▼ -1.04    | 1.0E-03                      | +                      | N   |
| 740875                           | 3.0                                                                     | 3.2  | 2.8   | 2.6  | RSP_2140        | RSP_2140  | Protein of unknown function (DUF1194)                           | N                                    | Y                           | TCACATCCCTTCAG                                        | ▼ -1.28                                                 | 1.6E-05 | ▲ 1.67  | 4.3E-02 | n.s.       | n.s.                         | -                      | N   |
| 1472000                          | 2.1                                                                     | 2.2  | 1.9   | 1.8  | RSP_2839        | ntrY      | NtrY Signal transduction histidine kinase                       | Y                                    | N                           | TCACATCCCTTCAG                                        | ▼ -1.46                                                 | 6.4E-03 | ▲ 0.78  | 5.4E-02 | ▲ 0.58     | 3.8E-02                      | -                      | N   |
| 742800                           | 1.9                                                                     | 1.6  | 1.8   | 1.6  | RSP_2141        | RSP_2141  | ABC polyamine transporter periplasmic substrate-binding protein | N                                    | Y                           | TCACATCCCTTCAG                                        | ▲ 1.11                                                  | 9.4E-05 | ▼ -0.46 | 1.2E-02 | n.s.       | n.s.                         | +                      | N   |
| 1371600                          | 1.5                                                                     | 1.7  | 1.6   | 1.5  | RSP_2721        | RSP_2721  | hypothetical protein                                            | N                                    | Y                           | TCACATCCCTTCAG                                        | ▼ -0.56                                                 | 2.0E-02 | ▲ 1.10  | 1.3E-02 | ▲ 0.87     | 1.3E-03                      | +                      | N   |
| <b>Cytoplasmic proteins</b>      |                                                                         |      |       |      |                 |           |                                                                 |                                      |                             |                                                       |                                                         |         |         |         |            |                              |                        |     |
| 1039245                          | 4.1                                                                     | 2.5  | --    | --   | RSP_2410        | rpoH1     | RNA polymerase sigma 32 subunit - RpoH                          | N                                    | N                           | TTACATCCCTTCAT                                        | ▲ 3.20                                                  | 3.2E-04 | ▼ -3.38 | 1.4E-06 | ▼ -2.30    | 4.6E-06                      | +                      | N   |
| 2296600                          | 1.6                                                                     | --   | --    | --   | RSP_0559        | msrA      | Peptide methionine sulfoxide reductase                          | N                                    | N                           | TGGCCAGGCTTCAG                                        | ▲ 3.11                                                  | 8.9E-06 | ▼ -1.78 | 1.6E-04 | ▼ -1.41    | 4.1E-04                      | +                      | N   |
| 165500                           | 1.5                                                                     | --   | --    | --   | RSP_1572        | RSP_1572  | Heat shock protein Hsp20 family                                 | N                                    | N                           | TCACATCCCTTCAG                                        | ▲ 0.46                                                  | 1.4E-02 | ▼ -0.39 | 6.4E-03 | ▼ -0.78    | 1.2E-02                      | +                      | N   |
| 1511300                          | 1.8                                                                     | 1.6  | --    | --   | RSP_2806        | Lon       | ATP-dependent proteinase                                        | N                                    | N                           | TCACATCCCTTCAG                                        | ▲ 1.08                                                  | 1.8E-03 | ▼ -0.54 | 7.1E-03 | n.s.       | n.s.                         | +                      | N   |
| 67000 (chr2)                     | 1.9                                                                     | 2.3  | 2.1   | 2.2  | RSP_4110        | whiL      | glycossyl transferase                                           | N                                    | N                           | TCACATCCCTTCAG                                        | ▲ 0.86                                                  | 5.1E-02 | n.s.    | n.s.    | n.s.       | n.s.                         | +                      | N   |
| 2526668                          | 2.7                                                                     | 3.3  | 3.0   | 2.7  | RSP_0782        | RSP_0782  | Ppx/GppA phosphatase                                            | N                                    | N                           | TCACATCCCTTCAG                                        | ▼ -1.52                                                 | 1.2E-02 | ▲ 0.89  | 2.6E-02 | n.s.       | n.s.                         | -                      | N   |
| 62100 (chr2)                     | 1.8                                                                     | 2.1  | 1.8   | 1.7  | RSP_3989        | RSP_3989  | NAD-dependent epimerase/dehydratase                             | N                                    | N                           | TCACATCCCTTCAG                                        | ▼ -2.32                                                 | 8.8E-04 | ▲ 1.30  | 7.1E-03 | n.s.       | n.s.                         | -                      | N   |
| 1418670                          | 3.4                                                                     | 4.1  | 3.7   | 3.3  | RSP_2771        | RSP_2771  | putative Exopolyphosphatase                                     | N                                    | N                           | TCACATCCCTTCAG                                        | ▼ -1.01                                                 | 4.5E-02 | ▲ 1.26  | 4.9E-03 | n.s.       | n.s.                         | -                      | N   |
| 2931800                          | 1.6                                                                     | --   | --    | --   | RSP_1167        | argJ      | glutamate N-acetyltransferase                                   | N                                    | N                           | TCACATCCCTTCAG                                        | ▲ 1.92                                                  | 2.3E-04 | ▼ -1.02 | 1.7E-03 | ▼ -0.47    | 4.3E-02                      | +                      | N   |

a Chromosomal position of ChIP-seq peak (chr2 - chromosome 2)

b Transmembrane domain predicted using TMHMM 2.0 [132]

c Signaling transit peptides identified using SignalP 5.0 [133], scores  $\geq 0.6$  were interpreted to have predicted transit peptides

d log<sub>2</sub>(Fold-Change) are reported relative to WT (i.e. mutant/WT)

e Regulatory role of CenR based on changes in gene expression between TCS mutants relative to WT cells. (+) positively regulated by CenR, (-) negatively regulated by CenK, (NA) Not assigned from data

f Essentiality determined previously by Tn-seq analysis [33]

-- No significant ChIP enrichment

\* Peak located between differentially expressed genes

n.s. Not significant, RNA FDR p-value > 0.05 cutoff
