# Supplementary material for: The essential Rhodobacter sphaeroides CenKR two-component system regulates cell division and envelope biosynthesis
Source: PubMed Central journal article supplement (PMC9275681; doi:10.1371/journal.pgen.1010270), 2022-06-29
Supplement: pgen.1010270.s008.pdf [file pgen.1010270.s008.pdf]

**Table S2. Primers, plasmids, and strains lists.****A. Primers**

| <b>Name</b>             | <b>Sequence</b>                           | <b>Purpose</b>                                                    |
|-------------------------|-------------------------------------------|-------------------------------------------------------------------|
| BDL3-3                  | TAGAAAGCCAGTCCGCAGAAAC                    | PCR Linearization of pk18mobsacB                                  |
| BDL3-4                  | CTGTCGTGCCAGCTGCATTAATGAATCG              |                                                                   |
| BDL77-2                 | TTAATGCAGCTGGCACGACAGCCTGACGAACGAGACG     | PCR upstream flank for RSP1056 deletion vector                    |
| BDL78-2                 | CCGACAGATCAGATCTTGTCCTTCCGAC              |                                                                   |
| BDL79-2                 | GACAAGATCTGATCTGTCGGCCCCCTC               |                                                                   |
| BDL80-2                 | CTGCGGACTGGCTTTCTACGATCCGCGCGGGCTCG       | PCR downstream flank for RSP1056 deletion vector                  |
| BDL1-3                  | ATCCCCTGATTCTGTGGATAACCGTATTACCG          | PCR amplification of pk18mobsacB cloning site                     |
| BDL2-3                  | CCCAGTCTAGCTATCGCCATGTAAGCC               |                                                                   |
| BDL74-1                 | GCTCAACGAACTGTCGAAAC                      | Sequencing primers of RSP1056 deletion                            |
| BDL75-1                 | CCGGTTCGCTTCTGATGAT                       |                                                                   |
| BDL77-3                 | TAATGCAGCTGGCACGACAGATTGAGATAGAGGAGCACG   | PCR amplification of upstream flank for RSP0847 deletion vector   |
| BDL78-3                 | CTTAATTTGATCCGGTCACTCCTTCGTTTCGTG         |                                                                   |
| BDL79-3                 | AGGAGTGACCGGATCAAATTAAGGATCACACTC         | PCR amplification of downstream flank for RSP0847 deletion vector |
| BDL80-3                 | TTCTGCGGACTGGCTTTCTAGTAGGACCACCAGGAATAGAG |                                                                   |
| BDL43-3<br>(cenR_seq_F) | TCGATGGCGTAATGTTCTTCGC                    | Sequencing primers of RSP0847 deletion                            |
| BDL4-4<br>(cenR_seq_R)  | GACCGAGTTGATGTTCCAGGTG                    |                                                                   |
| BDL77-3                 | TAATGCAGCTGGCACGACAGATTGAGATAGAGGAGCACG   | PCR RSP0847D56A upstream flank for pk18mobsacB                    |
| BDL37-4                 | AGACCCACGGCGAGGATCACGAGGTCGTAGAG          |                                                                   |
| BDL36-4                 | TGATCCTCGCCGTGGGTCTGCCGGACAC              | PCR RSP0847D56A downstream flank for pk18mobsacB                  |
| BDL11-4                 | TTCTGCGGACTGGCTTTCTACCGTTGTAGCTCTTCTGTC   |                                                                   |
| BDL77-3                 | TAATGCAGCTGGCACGACAGATTGAGATAGAGGAGCACG   | PCR RSP0847D56E upstream flank for pk18mobsacB                    |
| BDL9-4                  | AGACCCACCTCGAGGATCACGAGGTCGTAGAG          |                                                                   |
| BDL10-4                 | TGATCCTCGAGGTGGGTCTGCCGGACAC              | PCR RSP0847D56E downstream flank for pk18mobsacB                  |
| BDL11-4                 | TTCTGCGGACTGGCTTTCTACCGTTGTAGCTCTTCTGTC   |                                                                   |
| BDL12-4                 | CTTCCGCTTCTTCTAGCCAG                      | Sequencing primers for RSP0847 variants                           |

|         |                                                 |                                                                                           |
|---------|-------------------------------------------------|-------------------------------------------------------------------------------------------|
| BDL13-4 | GAAGGGCTTCGTACATAGTCG                           |                                                                                           |
| BDL1-5  | ATTTTCAGAGCGCGATCGCAGGAATGACCGCCTATGCCGAAGCG    | RSP1056-cyto (truncated at M195) insertion into pVP302K with N-terminal H8-TEV tag        |
| BDL2-5  | TTGTTATTTTCGGCTTTCTGTCAGACGAGGGCGCTGAGACC       |                                                                                           |
| BDL3-5  | GAGGAGAAATTAACCATGGCTTCCCTGAAGAAGATCC           | RSP0847 (WT, D56A) insertion into pVP302K with C-terminal TEV-H8                          |
| BDL4-5  | TTCGCTTCCCTGCGATCGCCGCAACAAGCCTGTAGCC           |                                                                                           |
| BDL7-5  | AAAGAGGAGAAATTAACCATGACCTCCGACACGACGC           | RSP1274 insertion into pVP302K with C-terminal TEV-H8                                     |
| BDL8-5  | TTTTCGCTTCCCTGCGATCGCGGCGCTGAGCGTTTTCGGTCCG     |                                                                                           |
| BDL9-5  | AAGAGGAGAAATTAACCATGGTCCCGTGCATTCTTGCGCTC       | RSP1083 insertion into pVP302K with C-terminal TEV-H8                                     |
| BDL10-5 | TTTTCGCTTCCCTGCGATCGCGCCGGCGAAGGTGTAGCC         |                                                                                           |
| BDL11-5 | ACATTTCCCGAAAAGTGCCAC                           | pVP302K sequencing primers                                                                |
| BDL12-5 | CTTTGTTAGCAGCCGGATCAGC                          |                                                                                           |
| BDL41-1 | CATATGTAATTTCTCCTC                              | ATW linearization of pIND5 <sub>spec</sub>                                                |
| BDL42-1 | GGATCCAGATCTCATCACCATC                          |                                                                                           |
| BDL75-3 | AAGAGGAGAAATTACATATGGCTTCCCTGAAGAAGATCC         | Amplification of the coding region of <i>cenR</i> for assembly into pIND5 <sub>spec</sub> |
| BDL76-3 | GATGAGATCTGGATCCTCCTCACGCAACAAGCCTGTAGCCG       |                                                                                           |
| BDL33-1 | CTTGTGAGCGGATAACAATGATAC                        | Sequencing primers for pIND5 <sub>spec</sub>                                              |
| BDL34-1 | CAACCGAGCGTTCTGAACAAATCC                        |                                                                                           |
| BDL16-8 | CGAACTTCACGGTGAGCGTTG                           | Amplification of <i>tolQ</i> promoter region for EMSA                                     |
| BDL17-8 | GCATCCTCCTCGATCAGGAG                            |                                                                                           |
| BDL18-8 | CAAGCTCTCGCCGAAGG                               | Amplification of <i>rpoH1</i> promoter region for EMSA                                    |
| BDL19-8 | TGTAAGTGCTCATTCGTTGAC                           |                                                                                           |
| BDL20-8 | CCGTCCCTTCGACCCGCCTC                            | Amplification of RSP2175 promoter region for EMSA                                         |
| BDL21-8 | GCAGGTGGCGGAACCGGGAG                            |                                                                                           |
| BDL22-8 | CAGAAAGCCGAAAATAACAAAG                          | Linearization of pVP302K with N-terminal H <sub>8</sub> tag                               |
| BDL23-8 | TCCTGCGATCGCGCTCTGAAAATAC                       |                                                                                           |
| BDL24-8 | GTATTTTCAGAGCGCGATCGCAGGAATGGCTTCCCTGAAGAAGATCC | Amplification of 0847D56E gene for cloning into pVP302K-N                                 |
| BDL25-8 | AACTTTGTTATTTTCGGCTTTCTGTCACGCAACAAGCCTGTAGC    |                                                                                           |
| BDL26-8 | ATCCTCGAGGTGGGTCTGCCGGACACC                     | ATW linearization primers to make pVP302K-N-0847 from pVP302K-N-0847D56E                  |
| BDL27-8 | AGACCCACCTCGAGGATCACGAGGTCCG                    |                                                                                           |

## B. Plasmids

| Name                              | Description                                                                                                                                                                                                   | Source    |
|-----------------------------------|---------------------------------------------------------------------------------------------------------------------------------------------------------------------------------------------------------------|-----------|
| pk18mobsacB                       | Broad host range mobilizable vector; Km <sup>R</sup> oriT(RP4) mobT <i>sacB lacZa</i>                                                                                                                         | [1]       |
| pk18mobsacB-RSP1056               | <i>R. sphaeroides</i> genomic region flanking <i>RSP1056</i> Gibson assembled into pk18; Km <sup>R</sup> ; for deletion of <i>RSP1056</i>                                                                     | This work |
| pk18mobsacB-RSP0847               | <i>R. sphaeroides</i> genomic region flanking <i>RSP0847</i> Gibson assembled into pk18; Km <sup>R</sup> ; for deletion of <i>RSP0847</i>                                                                     | This work |
| pk18mobsacB-RSP0847(D56A)         | <i>R. sphaeroides</i> genomic regions containing the <i>RSP0847D56A</i> allele and genomic regions flanking the gene Gibson assembled into pk18; Km <sup>R</sup> ; for allelic exchange within <i>RSP0847</i> | This work |
| pk18mobsacB-RSP0847(D56E)         | <i>R. sphaeroides</i> genomic regions containing the <i>RSP0847D56E</i> allele and genomic regions flanking the gene Gibson assembled into pk18; Km <sup>R</sup> ; for allelic exchange within <i>RSP0847</i> | This work |
| pIND5 <sub>spec</sub>             | Replicable plasmid used for protein expression in <i>Rb. sphaeroides</i> .                                                                                                                                    | [2]       |
| pIND5 <sub>spec</sub> -0847       | Ectopic expression of <i>RSP0847</i> ( <i>cenR</i> )                                                                                                                                                          | This work |
| pVP302K-N/C                       | Protein expression vector; Km <sup>R</sup> lac promoter lacI, Tev site <i>rtxA</i> ( <i>V. cholera</i> ) coding sequence for 8×His-tag                                                                        | [3]       |
| pVP302K-N-RSP1056 <sub>cyto</sub> | pVP302K containing truncated <i>RSP1056</i> at M195                                                                                                                                                           | This work |
| pVP302K-C-RSP0847                 | pVP302K containing <i>RSP0847</i>                                                                                                                                                                             | This work |
| pVP302K-C-RSP0847(D56A)           | pVP302K containing <i>RSP0847</i> variant D56A                                                                                                                                                                | This work |
| pVP302K-C-RSP1274                 | pVP302K containing <i>RSP1274</i>                                                                                                                                                                             | This work |
| pVP302K-C-RSP1083                 | pVP302K containing <i>RSP1083</i>                                                                                                                                                                             | This work |
| pVP302K-N-0847D56E                | pVP302K containing <i>RSP0847</i> variant D56E with N-terminal H <sub>8</sub> tag                                                                                                                             | This work |
| pVP302K-N-0847                    | pVP302K containing <i>RSP0847</i> with N-terminal H <sub>8</sub> tag                                                                                                                                          | This work |

## C. Strains

| Strains                                       | Relevant characteristics                                                                                                                                                                                                                                          | Reference           |
|-----------------------------------------------|-------------------------------------------------------------------------------------------------------------------------------------------------------------------------------------------------------------------------------------------------------------------|---------------------|
| <b><i>Rhodobacter sphaeroides</i> strains</b> |                                                                                                                                                                                                                                                                   |                     |
| 2.4.1                                         | Wild-type strain                                                                                                                                                                                                                                                  | ATCC 17023          |
| BDL021                                        | $\Delta RSP1056$ ( $\Delta cenK$ )                                                                                                                                                                                                                                | This work           |
| BDL072                                        | <i>RSP0847D56A</i> ( <i>cenR</i> D56A)                                                                                                                                                                                                                            | This work           |
| BDL019                                        | <i>RSP0847D56E</i> ( <i>cenR</i> D56E)                                                                                                                                                                                                                            | This work           |
| BDL020                                        | <i>RSP0847D56E</i> $\Delta RSP1056$ ( <i>cenR</i> D56E $\Delta cenK$ )                                                                                                                                                                                            | This work           |
| BDL013                                        | pIND5 <sub>spec</sub> - <i>cenR</i>                                                                                                                                                                                                                               | This work           |
| BDL121                                        | pIND5 <sub>spec</sub> - <i>cenR</i> $\Delta cenR$                                                                                                                                                                                                                 | This work           |
| <b><i>Escherichia coli</i> strains</b>        |                                                                                                                                                                                                                                                                   |                     |
| DH5 $\alpha$                                  | F- $\Phi 80lacZ\Delta M15$ $\Delta(lacZYA-argF)$ U169 <i>recA1 endA1 hsdR17</i> (rK <sup>-</sup> , mK <sup>+</sup> ) <i>phoA supE44</i> $\lambda$ - <i>thi-1 gyrA96 relA1</i>                                                                                     | New England Biolabs |
| S17-1                                         | <i>TpR SmR recA1 thiE1 pro-82 hsdR17 RP4-2-Tc::Mu-Km::Tn7</i> $\lambda$ pir                                                                                                                                                                                       | [4]                 |
| NEB 5-alpha competent <i>E. coli</i>          | <i>fhuA2</i> $\Delta(argF-lacZ)$ U169 <i>phoA glnV44</i> $\Phi 80$ $\Delta(lacZ)$ M15 <i>gyrA96 recA1 relA1 endA1 thi-1 hsdR17</i>                                                                                                                                | New England Biolabs |
| B834                                          | F- <i>hsdS metE gal ompT</i>                                                                                                                                                                                                                                      | [5,6]               |
| BL21 (DE3) pLysS CodonPlus                    | <i>E. coli</i> str. B F <sup>-</sup> <i>ompT gal dcm lon hsdSB</i> (rB-mB-) $\lambda$ (DE3 [ <i>lacI lacUV5-T7p07 ind1 sam7 nin5</i> ]) [ <i>malB+</i> ]K-12( $\lambda$ S) pLysS[T7p20 orip15A](CmR) <i>argU</i> (AGA, AGG), <i>ileY</i> (AUA), <i>leuW</i> (CUA) | Novagen             |

## References.

1. Schäfer A, Tauch A, Jäger W, Kalinowski J, Thierbach G, Pühler A. Small mobilizable multi-purpose cloning vectors derived from the *Escherichia coli* plasmids pK18 and pK19: selection of defined deletions in the chromosome of *Corynebacterium glutamicum*. *Gene*. 1994;145(1):69–73. doi: 10.1016/0378-1119(94)90324-7.
2. Ind AC, Porter SL, Brown MT, Byles ED, de Beyer JA, Godfrey SA, Armitage JP. Inducible Expression Plasmid for *Rhodobacter sphaeroides* and *Paracoccus denitrificans*. *Appl. Environ. Microbiol.* 2009;75:6613–6615. doi: 10.1128/AEM.01587-09.
3. Gall DL, Ralph J, Donohue TJ, Noguera DR. A Group of Sequence-Related Sphingomonad Enzymes Catalyzes Cleavage of  $\beta$ -Aryl Ether Linkages in Lignin  $\beta$ -Guaiacyl and  $\beta$ -Syringyl Ether Dimers. *Environ Sci Technol.* 2014;48(20):12454–63. doi: 10.1021/es503886d.
4. Simon R, Priefer U, Pühler AA. A broad range mobilization system for in vivo genetic engineering: transposon mutagenesis in Gram-negative bacteria. *Nat Biotechnol.* 1983;(1):784-791. doi: 10.1038/nbt1183-784.
5. Doherty AJ, Ashford SR, Brannigan JA, Wigley DB. A superior host strain for the over-expression of cloned genes using the T7 promoter based vectors. *Nucleic Acids Res.* 1995 Jun 11;23(11):2074-5. doi: 10.1093/nar/23.11.2074.
6. Wood WB. Host specificity of DNA produced by *Escherichia coli*: bacterial mutations affecting the restriction and modification of DNA. *J Mol Biol.* 1966 Mar;16(1):118-33. doi: 10.1016/s0022-2836(66)80267-x.
