# Supplementary material for: The essential Rhodobacter sphaeroides CenKR two-component system regulates cell division and envelope biosynthesis
Source: PubMed Central journal article supplement (PMC9275681; doi:10.1371/journal.pgen.1010270), 2022-06-29
Supplement: pgen.1010270.s009.pdf [file pgen.1010270.s009.pdf]

**Table S3. Genbank accession numbers for all protein sequences used in CenK/R phylogeny (Fig 6).**

| <b>Organism</b>                            | <b>CenK homolog</b> | <b>CenR homolog</b>           |
|--------------------------------------------|---------------------|-------------------------------|
| <i>Rhodobacter sphaeroides 2.4.1</i>       | ABA80240.1          | ABA80028.1                    |
| <i>Rhodobacter ovatus</i>                  | WP_097029852.1      | WP_097029114.1                |
| <i>Cereibacter changlensis</i>             | PZX58573.1          | WP_107663473.1                |
| <i>Defluviimonas denitrificans</i>         | WP_105515131.1      | WP_105516383.1                |
| <i>Pseudorhodobacter aquimaris</i>         | WP_083444869.1      | WP_050526965.1                |
| <i>Pseudorhodobacter wandonensis</i>       | WP_050524403.1      | WP_050523141.1                |
| <i>Roseibacterium elongatum</i>            | WP_025311819.1      | WP_025311137.1                |
| <i>Paracoccus aminovorans</i>              | WP_062561073.1      | WP_074969281.1                |
| <i>Rhodobacter capsulatus</i>              | WP_055211899.1      | WP_136906601.1                |
| <i>Roseicitreum antarcticum</i>            | WP_092887326.1      | WP_092887229.1                |
| <i>Gemmobacter megaterium</i>              | WP_083701327.1      | WP_076533744.1                |
| <i>Meinhardsimonia xiamenensis</i>         | WP_092500460.1      | WP_092497609.1                |
| <i>Pararhodobacter aggregans</i>           | WP_107753170.1      | WP_107752404.1                |
| <i>Paracoccus zeaxanthinifaciens</i>       | WP_022708257.1      | WP_022707883.1                |
| <i>Pontivivens insulae</i>                 | WP_108783177.1      | WP_108783392.1                |
| <i>Oceanicella actignis</i>                | WP_211356277.1      | WP_072746865.1                |
| <i>Maricaulis maris</i>                    | WP_121209738.1      | WP_041637067.1                |
| <i>Hirschia maritima</i>                   | WP_155826066.1      | WP_018997296.1                |
| <i>Hyphomonas oceanitis</i>                | WP_051624558.1      | WP_035538430.1                |
| <i>Ponticaulis koreensis</i>               | WP_022695910.1      | WP_022693572.1                |
| <i>Henriciella algicola</i>                | WP_119455183.1      | WP_119453332.1                |
| <i>Bradyrhizobium erythrophlei</i>         | WP_074272850.1      | WP_072818367.1                |
| <i>Parvularculaceae bacterium</i>          | MCB2096247.1        | MAW81539.1                    |
| <i>Amphiplicatus metriothermophilus</i>    | WP_089410642.1      | WP_089410979.1                |
| <i>Marinicaulis flavus</i>                 | WP_104828836.1      | WP_104829420.1                |
| <i>Caulobacter crescentus (vibrioides)</i> | WP_010918418.1      | WP_024266002.1                |
| <i>Caulobacter segnis</i>                  | WP_013077599.1      | PZR32001.1                    |
| <i>Caulobacter henricii</i>                | WP_035045754.1      | WP_062151853.1                |
| <i>Phenylobacterium haematophilum</i>      | WP_183772596.1      | WP_183775692.1                |
| <i>Asticcacaulis endophyticus</i>          | GGZ27123.1          | WP_189484874.1                |
| <i>Brevundimonas bacteroides</i>           | WP_029414873.1      | WP_029417475.1                |
| <i>Oceanicaulis alexandrii</i>             | WP_022701438.1      | WP_009802422.1                |
| <i>Ruegeria atlantica</i>                  | NOD30888.1          | WP_058279748.1                |
| <i>Ruegeria litorea</i>                    | WP_085794123.1      | WP_085797046.1 ( <i>sp.</i> ) |
| <i>Ruegeria pomeroyi</i>                   | WP_011046299.1      | WP_011049109.1                |
| <i>Thalassobius activus</i>                | WP_058313840.1      | WP_209358005.1                |
| <i>Roseobacter cerasinus</i>               | WP_159974535.1      | WP_159975066.1                |
| <i>Roseobacter denitrificans</i>           | WP_011567720.1      | WP_011566403.1 ( <i>sp.</i> ) |
| <i>Sulfitobacter pontiacus</i>             | WP_064215825.1      | WP_005850360.1                |
| <i>Lutimaribacter pacificus</i>            | WP_149789044.1      | WP_149788025.1                |
| <i>Roseovarius aestuarii</i>               | WP_085800950.1      | WP_085800306.1                |
| <i>Nitratireductor aquibiodomus</i>        | WP_065816343.1      | WP_065816950.1                |
| <i>Nitratireductor pacificus</i>           | WP_040676576.1      | WP_008596599.1                |
| <i>Hoeflea phototrophica</i>               | WP_007199885.1      | WP_007199422.1                |
| <i>Phyllobacterium phragmitis</i>          | WP_105743815.1      | WP_105741337.1                |
| <i>Phyllobacterium leguminum</i>           | WP_110752236.1      | WP_110749900.1                |
| <i>Agrobacterium tumefaciens</i>           | KIQ02346.1          | AMD60228.1                    |
| <i>Sinorhizobium meliloti</i>              | RVJ02864.1          | WP_100672725.1                |
| <i>Chelativorans alearensis</i>            | WP_163266599.1      | WP_163265216.1                |

|                                        |                |                      |
|----------------------------------------|----------------|----------------------|
| <i>Pseudovibrio denitrificans</i>      | WP_054784296.1 | WP_041767864.1       |
| <i>Azorhizobium caulinodans</i>        | WP_043879669.1 | WP_012168621.1       |
| <i>Bosea robiniae</i>                  | WP_091856047.1 | WP_061966680.1       |
| <i>Pararhizobium polonicum</i>         | WP_099050751.1 | WP_068955266.1       |
| <i>Mesorhizobium albiziae</i>          | WP_188130341.1 | WP_149759750.1       |
| <i>Neorhizobium galegae</i>            | WP_046664845.1 | WP_210105920.1       |
| <i>Brucella rhizophere</i>             | WP_094579191.1 | WP_094578402.1       |
| <i>Brucella abortus</i>                | WP_002963438.1 | WP_002965068.1       |
| <i>Brucella melitensis</i>             | SPU63212.1     | WP_070997026.1       |
| <i>Labrenzia (Roseibium) alba</i>      | WP_055675062.1 | WP_055677803.1       |
| <i>Labrenzia (Roseibium) aggregate</i> | WP_206904135.1 | WP_190291169.1       |
| <i>Nitrobacter winogradskyi</i>        | WP_141383471.1 | WP_011313424.1       |
| <i>Nitrobacter hamburgensis</i>        | WP_011512071.1 | WP_011508702.1       |
| <i>Rhodopseudomonas palustris</i>      | WP_044412660.1 | MBI5130782.1         |
| <i>Sneathiella sp.</i>                 | PHQ71087.1     | PHQ71627.1           |
| <i>Sneathiella litorea</i>             | MZR29347.1     | WP_161314357.1       |
| <i>Sneathiella chinensis</i>           | WP_169559456.1 | WP_169559000.1       |
| <i>Kiloniella majae</i>                | WP_085900939.1 | WP_047764063.1       |
| <i>Kiliella laminaria</i>              | WP_020590891.1 | WP_020590402.1       |
| <i>Skermanella rosea</i>               | WP_203096208.1 | WP_203098182.1       |
| <i>Denitrobaculum tricleocarpae</i>    | WP_142894422.1 | WP_142896990.1       |
| <i>Fodinicurvata sediminis</i>         | WP_022727682.1 | WP_022727791.1       |
| <i>Roseospirillum parvum</i>           | WP_092616041.1 | WP_092621908.1       |
| <i>Novispirillum itersonii</i>         | WP_184264282.1 | WP_184262290.1       |
| <i>Ferruginivarius sediminum</i>       | WP_114583718.1 | WP_114580497.1       |
| <i>Azospirillum halopraeferens</i>     | WP_029009133.1 | WP_029010793.1       |
| <i>Azospirillum lipoferum</i>          | WP_085554914.1 | WP_085555599.1       |
| <i>Thalassospira profundimaris</i>     | WP_114112327.1 | WP_114100359.1       |
| <i>Thalassospira povalilytica</i>      | WP_206926285.1 | WP_062950084.1 (sp.) |
| <i>Thalassospira xiamenensis</i>       | WP_097053219.1 | WP_101246657.1 (sp.) |
| <i>Curvivirus aplysinae</i>            | WP_155157144.1 | WP_155154090.1       |
| <i>Aestuariuspira insulae</i>          | WP_115938537.1 | WP_115936241.1       |
| <i>Oceanibaculum pacificum</i>         | WP_067557655.1 | WP_067551072.1       |
