# Supplementary material for: The essential Rhodobacter sphaeroides CenKR two-component system regulates cell division and envelope biosynthesis
Source: PubMed Central journal article supplement (PMC9275681; doi:10.1371/journal.pgen.1010270), 2022-06-29
Supplement: pgen.1010270.s010.pdf [file pgen.1010270.s010.pdf]

**Table S4. PatSer motif search (Fig 6) and PWM for CenR binding motif in *Rhodobacter sphaeroides* 2.4.1**

**A. PatSer motif search**

| Identified gene <sup>1</sup>                        | Position (distance from start codon) <sup>2</sup> | Score <sup>3</sup> | ln(p-value) | Sequence         |
|-----------------------------------------------------|---------------------------------------------------|--------------------|-------------|------------------|
| <b><i>Rhodobacter sphaeroides</i> 2.4.1</b>         |                                                   |                    |             |                  |
| <i>cenR</i>                                         | 183                                               | 7.4                | -9.45       | TTGCAGGAAATTGAA  |
| <i>msrA</i>                                         | 199                                               | 9.98               | -12.6       | TGGCGGAGCGTGAT   |
| <i>RSP1807</i>                                      | 231                                               | 8.59               | -10.77      | TCGCAAAACCTTGAT  |
| <i>RSP1860</i>                                      | 177                                               | 7.11               | -9.16       | TGGCAAAAATGTCAC  |
| <i>surA</i>                                         | 142                                               | 9.01               | -11.28      | TGACATGATCGTGTG  |
| <i>tolQ</i>                                         | 213                                               | 9.98               | -12.6       | TGACGCAGATGTGTT  |
| <b><i>Agrobacterium tumefaciens</i> BIM B-1315G</b> |                                                   |                    |             |                  |
| <i>cenR</i><br>(IAI05_12475)                        | 65                                                | 8.44               | -10.6       | TCACGAGATTTTGCT  |
| <i>msrA</i><br>(IAI05_13425)                        | 101                                               | 8.46               | -10.62      | TGGCGCTTCATTGAA  |
| <i>RSP1807</i><br>(IAI05_12080)                     | 197                                               | 10.11              | -12.79      | TGACTTTCTATTGAA  |
| <i>RSP1860</i><br>(IAI05_01710)                     | 171                                               | 9.5                | -11.91      | ACACATTAACGTGAA  |
| <i>surA</i><br>(IAI05_17235)                        | 239                                               | 3.26               | -5.89       | TGGAAGTTTTTTCAG  |
| <i>tolQ</i><br>(IAI05_18005)                        | 240                                               | 7.88               | -9.96       | TAACACGCGTTTGAA  |
| <b><i>Brucella abortus</i> 2308</b>                 |                                                   |                    |             |                  |
| <i>cenR</i><br>(BAB1_2006)                          | 121                                               | 4.33               | -6.68       | TCAAGGTCTTTTCGAG |
| <i>msrA</i><br>(BAB2_1029)                          | 116                                               | 7.5                | -9.55       | AGAAGCGACCGTGAC  |
| <i>RSP1807</i><br>(BAB1_0088)                       | 146                                               | 7.66               | -9.73       | TGAATTCCTATTGAT  |
| <i>RSP1860</i><br>(BAB1_0408)                       | 94                                                | 5.39               | -7.55       | TAGCAATGGTCTGAT  |
| <i>surA</i><br>(BAB1_1944)                          | 160                                               | 7.32               | -9.37       | TTGCTTCAAAGTGAT  |
| <i>tolQ</i><br>(BAB1_1712)                          | 238                                               | 5.9                | -8          | TAACGGATTTGCGAT  |
| <b><i>Caulobacter crescentus</i> NA1000</b>         |                                                   |                    |             |                  |
| <i>cenR</i><br>(CCNA_03859)                         | 195                                               | 4.02               | -6.44       | TCCCGCAAGCTCGAA  |
| <i>msrA</i><br>(CCNA_01046)                         | 65                                                | 3.7                | -6.21       | AGAGAGGGATTTCGAA |
| <i>RSP1807</i><br>(CCNA_03780)                      | 259                                               | 8.04               | -10.14      | TCACGGCCTCGTGAA  |
| <i>RSP1860</i><br>(CCNA_03062)                      | 125                                               | 6.32               | -8.39       | TCAAGTGCTTGCGAG  |
| <i>surA</i><br>(CCNA_03163)                         | 145                                               | 3.6                | -6.13       | TGGTGTCAACGCGAA  |
| <i>tolQ</i><br>(CCNA_03341)                         | 66                                                | 2.49               | -5.36       | TGAGGTGCTGTTCGA  |
| <b><i>Rhodopseudomonas palustris</i> RCB100</b>     |                                                   |                    |             |                  |

|                             |     |      |       |                 |
|-----------------------------|-----|------|-------|-----------------|
| <i>cenR</i><br>(RPA0283)    | 55  | 5.73 | -7.85 | ACAATCGCGCGTGAT |
| <i>msrA</i><br>(RPA4834)    | 100 | 7.19 | -9.02 | TGAAATTGAGTTGAG |
| <i>RSP1807</i><br>(RPA0201) | 108 | 5.82 | -7.93 | TGAGTGGCAGGTGAA |
| <i>RSP1860</i><br>(RPA0201) | NA  | NA   | NA    | NA              |
| <i>surA</i><br>(RPA0511)    | 83  | 6.60 | -8.65 | TTTCATCATTTTGAC |
| <i>tolQ</i><br>(RPA1117)    | 143 | 7.19 | -9.24 | TGACAGGGGATTGAG |

<sup>1</sup>blastn search to identify homologs of each *Rb. sphaeroides* gene (locus tag listed).

<sup>2</sup>Identified in 300bp genomic region upstream of start codon using in search.

<sup>3</sup>Scores determined by comparison of the base position in the sequence to the same position in the PWM (below). Scores for each position are summed for the length of the sequence, larger score means more positions matched more frequent bases in the PWM.

NA - could not identify a homolog with high sequence homology.

### B. PWM CenR binding motif in *Rhodobacter sphaeroides* 2.4.1 (Fig 4A) formatted for Patser

| nucleotide | Logo Position |   |   |   |   |   |   |   |   |    |    |    |    |    |    |
|------------|---------------|---|---|---|---|---|---|---|---|----|----|----|----|----|----|
|            | 1             | 2 | 3 | 4 | 5 | 6 | 7 | 8 | 9 | 10 | 11 | 12 | 13 | 14 | 15 |
| <b>A</b>   | 1             | 0 | 7 | 1 | 2 | 2 | 2 | 3 | 2 | 1  | 0  | 0  | 0  | 8  | 3  |
| <b>C</b>   | 0             | 3 | 0 | 8 | 0 | 4 | 1 | 2 | 2 | 4  | 1  | 1  | 0  | 0  | 4  |
| <b>G</b>   | 0             | 6 | 3 | 1 | 6 | 1 | 5 | 3 | 3 | 1  | 6  | 0  | 10 | 1  | 1  |
| <b>T</b>   | 9             | 1 | 0 | 0 | 1 | 3 | 2 | 2 | 3 | 4  | 2  | 9  | 0  | 1  | 3  |
