# Supplementary material for: The essential Rhodobacter sphaeroides CenKR two-component system regulates cell division and envelope biosynthesis
Source: PLoS Genet. 2022 Jun 29;18(6):e1010270. doi: 10.1371/journal.pgen.1010270 (PMC9275681; doi:10.1371/journal.pgen.1010270)
Supplement: S3 Data — (XLSX) [file pgen.1010270.s013.xlsx]

## Sheet: length
Replicate	Strain	Length
A	WT	1.11437
A	WT	1.16222
A	WT	1.16896
A	WT	1.17043
A	WT	1.22766
A	WT	1.2317
A	WT	1.23899
A	WT	1.24202
A	WT	1.24801
A	WT	1.249
A	WT	1.27263
A	WT	1.28096
A	WT	1.28238
A	WT	1.2842
A	WT	1.29596
A	WT	1.30358
A	WT	1.30367
A	WT	1.30837
A	WT	1.31113
A	WT	1.31892
A	WT	1.32417
A	WT	1.32453
A	WT	1.33079
A	WT	1.33195
A	WT	1.33227
A	WT	1.33234
A	WT	1.33331
A	WT	1.33404
A	WT	1.33461
A	WT	1.33465
A	WT	1.33646
A	WT	1.33694
A	WT	1.34192
A	WT	1.3446
A	WT	1.34482
A	WT	1.35245
A	WT	1.3532
A	WT	1.35987
A	WT	1.3653
A	WT	1.36562
A	WT	1.3661
A	WT	1.36769
A	WT	1.36829
A	WT	1.37128
A	WT	1.37149
A	WT	1.37189
A	WT	1.37244
A	WT	1.37543
A	WT	1.37824
A	WT	1.37885
A	WT	1.37977
A	WT	1.38276
A	WT	1.3844
A	WT	1.38927
A	WT	1.39025
A	WT	1.39094
A	WT	1.3914
A	WT	1.39186
A	WT	1.39339
A	WT	1.39352
A	WT	1.39754
A	WT	1.40125
A	WT	1.40256
A	WT	1.40264
A	WT	1.40347
A	WT	1.40368
A	WT	1.40432
A	WT	1.40455
A	WT	1.40522
A	WT	1.40953
A	WT	1.41116
A	WT	1.41146
A	WT	1.41579
A	WT	1.41611
A	WT	1.42204
A	WT	1.42248
A	WT	1.42259
A	WT	1.42451
A	WT	1.42466
A	WT	1.42672
A	WT	1.42869
A	WT	1.42915
A	WT	1.43086
A	WT	1.43151
A	WT	1.43178
A	WT	1.43219
A	WT	1.43227
A	WT	1.43299
A	WT	1.43623
A	WT	1.43688
A	WT	1.43919
A	WT	1.43942
A	WT	1.44139
A	WT	1.44149
A	WT	1.44227
A	WT	1.44287
A	WT	1.44505
A	WT	1.44994
A	WT	1.45063
A	WT	1.45309
A	WT	1.45408
A	WT	1.4541
A	WT	1.45448
A	WT	1.45451
A	WT	1.45457
A	WT	1.45601
A	WT	1.4572
A	WT	1.45722
A	WT	1.45757
A	WT	1.45846
A	WT	1.45897
A	WT	1.45913
A	WT	1.45942
A	WT	1.46003
A	WT	1.46043
A	WT	1.4607
A	WT	1.46181
A	WT	1.46188
A	WT	1.46272
A	WT	1.46302
A	WT	1.4635
A	WT	1.46377
A	WT	1.46391
A	WT	1.46465
A	WT	1.46655
A	WT	1.46818
A	WT	1.46887
A	WT	1.46931
A	WT	1.4702
A	WT	1.47048
A	WT	1.47048
A	WT	1.47074
A	WT	1.4712
A	WT	1.47172
A	WT	1.47181
A	WT	1.47183
A	WT	1.47193
A	WT	1.47288
A	WT	1.47442
A	WT	1.47542
A	WT	1.4759
A	WT	1.47607
A	WT	1.47708
A	WT	1.47737
A	WT	1.47738
A	WT	1.47808
A	WT	1.4781
A	WT	1.47814
A	WT	1.47917
A	WT	1.48017
A	WT	1.48068
A	WT	1.48089
A	WT	1.48111
A	WT	1.48463
A	WT	1.48627
A	WT	1.48639
A	WT	1.487
A	WT	1.48745
A	WT	1.48752
A	WT	1.4876
A	WT	1.48852
A	WT	1.48981
A	WT	1.49207
A	WT	1.49237
A	WT	1.49259
A	WT	1.49317
A	WT	1.49342
A	WT	1.49389
A	WT	1.49462
A	WT	1.49495
A	WT	1.49712
A	WT	1.4977
A	WT	1.4986
A	WT	1.49916
A	WT	1.5021
A	WT	1.50232
A	WT	1.50363
A	WT	1.50655
A	WT	1.50736
A	WT	1.50921
A	WT	1.51052
A	WT	1.51084
A	WT	1.51143
A	WT	1.51188
A	WT	1.51307
A	WT	1.51337
A	WT	1.51424
A	WT	1.51569
A	WT	1.51701
A	WT	1.51761
A	WT	1.51981
A	WT	1.52011
A	WT	1.52233
A	WT	1.52267
A	WT	1.52272
A	WT	1.5235
A	WT	1.5239
A	WT	1.52422
A	WT	1.52493
A	WT	1.52595
A	WT	1.52665
A	WT	1.52752
A	WT	1.52885
A	WT	1.52919
A	WT	1.53021
A	WT	1.53054
A	WT	1.53103
A	WT	1.53122
A	WT	1.53141
A	WT	1.53169
A	WT	1.53183
A	WT	1.53291
A	WT	1.53379
A	WT	1.53382
A	WT	1.53405
A	WT	1.53611
A	WT	1.53615
A	WT	1.54139
A	WT	1.54347
A	WT	1.54492
A	WT	1.54588
A	WT	1.54776
A	WT	1.54962
A	WT	1.54976
A	WT	1.5507
A	WT	1.55152
A	WT	1.55157
A	WT	1.55162
A	WT	1.55228
A	WT	1.55246
A	WT	1.55359
A	WT	1.55366
A	WT	1.55442
A	WT	1.55456
A	WT	1.55527
A	WT	1.55734
A	WT	1.55914
A	WT	1.56078
A	WT	1.56177
A	WT	1.56216
A	WT	1.56478
A	WT	1.56606
A	WT	1.56616
A	WT	1.56667
A	WT	1.56725
A	WT	1.56862
A	WT	1.57096
A	WT	1.57133
A	WT	1.57154
A	WT	1.57208
A	WT	1.57267
A	WT	1.57333
A	WT	1.57385
A	WT	1.57424
A	WT	1.5748
A	WT	1.57491
A	WT	1.57549
A	WT	1.57601
A	WT	1.57752
A	WT	1.57794
A	WT	1.57808
A	WT	1.57903
A	WT	1.57921
A	WT	1.5799
A	WT	1.58011
A	WT	1.58029
A	WT	1.58056
A	WT	1.58111
A	WT	1.58135
A	WT	1.58144
A	WT	1.58156
A	WT	1.58172
A	WT	1.58199
A	WT	1.58206
A	WT	1.5832
A	WT	1.58376
A	WT	1.58387
A	WT	1.58428
A	WT	1.58445
A	WT	1.58475
A	WT	1.58528
A	WT	1.58582
A	WT	1.58632
A	WT	1.587
A	WT	1.58786
A	WT	1.58898
A	WT	1.58902
A	WT	1.5902
A	WT	1.59045
A	WT	1.59248
A	WT	1.59254
A	WT	1.59263
A	WT	1.59387
A	WT	1.59422
A	WT	1.59588
A	WT	1.59635
A	WT	1.59637
A	WT	1.59718
A	WT	1.59796
A	WT	1.59893
A	WT	1.59905
A	WT	1.59914
A	WT	1.60003
A	WT	1.60038
A	WT	1.60041
A	WT	1.60063
A	WT	1.60143
A	WT	1.60174
A	WT	1.60176
A	WT	1.60195
A	WT	1.60257
A	WT	1.60314
A	WT	1.60379
A	WT	1.60603
A	WT	1.60735
A	WT	1.60741
A	WT	1.60862
A	WT	1.61079
A	WT	1.6121
A	WT	1.61273
A	WT	1.61362
A	WT	1.61406
A	WT	1.61458
A	WT	1.61475
A	WT	1.61919
A	WT	1.62165
A	WT	1.6234
A	WT	1.62413
A	WT	1.62438
A	WT	1.62507
A	WT	1.62554
A	WT	1.62573
A	WT	1.62618
A	WT	1.628
A	WT	1.62803
A	WT	1.62903
A	WT	1.62954
A	WT	1.63043
A	WT	1.63064
A	WT	1.63167
A	WT	1.63248
A	WT	1.63292
A	WT	1.63306
A	WT	1.63317
A	WT	1.63325
A	WT	1.634
A	WT	1.63421
A	WT	1.63515
A	WT	1.63516
A	WT	1.63611
A	WT	1.63611
A	WT	1.63756
A	WT	1.63806
A	WT	1.63855
A	WT	1.63996
A	WT	1.64013
A	WT	1.64171
A	WT	1.64208
A	WT	1.64285
A	WT	1.64295
A	WT	1.64336
A	WT	1.64384
A	WT	1.64531
A	WT	1.64588
A	WT	1.64601
A	WT	1.64661
A	WT	1.64679
A	WT	1.64804
A	WT	1.64834
A	WT	1.64847
A	WT	1.65017
A	WT	1.65095
A	WT	1.65111
A	WT	1.65236
A	WT	1.65293
A	WT	1.65317
A	WT	1.65321
A	WT	1.65358
A	WT	1.65466
A	WT	1.65616
A	WT	1.65668
A	WT	1.65683
A	WT	1.65751
A	WT	1.65902
A	WT	1.65972
A	WT	1.66006
A	WT	1.66027
A	WT	1.66037
A	WT	1.66045
A	WT	1.66254
A	WT	1.66269
A	WT	1.66292
A	WT	1.66299
A	WT	1.66326
A	WT	1.66356
A	WT	1.66453
A	WT	1.66487
A	WT	1.66515
A	WT	1.66537
A	WT	1.66602
A	WT	1.66653
A	WT	1.66865
A	WT	1.66875
A	WT	1.66972
A	WT	1.67
A	WT	1.67025
A	WT	1.67033
A	WT	1.67046
A	WT	1.67085
A	WT	1.67124
A	WT	1.67213
A	WT	1.67225
A	WT	1.67263
A	WT	1.67266
A	WT	1.67333
A	WT	1.67459
A	WT	1.6746
A	WT	1.67546
A	WT	1.67558
A	WT	1.67598
A	WT	1.67644
A	WT	1.67716
A	WT	1.6777
A	WT	1.67799
A	WT	1.67845
A	WT	1.67917
A	WT	1.68053
A	WT	1.68192
A	WT	1.68221
A	WT	1.68307
A	WT	1.68318
A	WT	1.68328
A	WT	1.68405
A	WT	1.68443
A	WT	1.68519
A	WT	1.68537
A	WT	1.68722
A	WT	1.68729
A	WT	1.68741
A	WT	1.68793
A	WT	1.688
A	WT	1.6883
A	WT	1.68905
A	WT	1.68931
A	WT	1.69049
A	WT	1.69115
A	WT	1.69118
A	WT	1.69172
A	WT	1.69194
A	WT	1.69211
A	WT	1.69325
A	WT	1.69456
A	WT	1.69458
A	WT	1.69474
A	WT	1.69541
A	WT	1.69566
A	WT	1.69624
A	WT	1.69645
A	WT	1.69735
A	WT	1.69914
A	WT	1.69918
A	WT	1.69951
A	WT	1.69958
A	WT	1.69986
A	WT	1.70167
A	WT	1.7027
A	WT	1.70275
A	WT	1.70386
A	WT	1.70409
A	WT	1.70506
A	WT	1.7052
A	WT	1.70618
A	WT	1.70848
A	WT	1.7085
A	WT	1.70873
A	WT	1.70874
A	WT	1.70889
A	WT	1.70917
A	WT	1.70971
A	WT	1.71099
A	WT	1.71121
A	WT	1.71135
A	WT	1.71153
A	WT	1.71249
A	WT	1.71307
A	WT	1.71392
A	WT	1.71811
A	WT	1.71851
A	WT	1.71909
A	WT	1.72083
A	WT	1.72203
A	WT	1.72359
A	WT	1.72426
A	WT	1.72445
A	WT	1.72471
A	WT	1.7249
A	WT	1.72674
A	WT	1.72765
A	WT	1.72808
A	WT	1.72825
A	WT	1.72871
A	WT	1.73012
A	WT	1.73036
A	WT	1.73082
A	WT	1.73153
A	WT	1.73257
A	WT	1.73313
A	WT	1.73418
A	WT	1.73585
A	WT	1.73677
A	WT	1.73694
A	WT	1.73717
A	WT	1.73731
A	WT	1.73808
A	WT	1.73934
A	WT	1.74055
A	WT	1.74057
A	WT	1.74096
A	WT	1.74153
A	WT	1.74222
A	WT	1.74233
A	WT	1.74328
A	WT	1.74333
A	WT	1.74336
A	WT	1.74428
A	WT	1.74494
A	WT	1.745
A	WT	1.74555
A	WT	1.74578
A	WT	1.74659
A	WT	1.74729
A	WT	1.74806
A	WT	1.74832
A	WT	1.74837
A	WT	1.74923
A	WT	1.74924
A	WT	1.75028
A	WT	1.75195
A	WT	1.75293
A	WT	1.75354
A	WT	1.75463
A	WT	1.75776
A	WT	1.75827
A	WT	1.75954
A	WT	1.75958
A	WT	1.75986
A	WT	1.75989
A	WT	1.76011
A	WT	1.76072
A	WT	1.76223
A	WT	1.76274
A	WT	1.76291
A	WT	1.76445
A	WT	1.76499
A	WT	1.7656
A	WT	1.76982
A	WT	1.77116
A	WT	1.77132
A	WT	1.7732
A	WT	1.77506
A	WT	1.77616
A	WT	1.77684
A	WT	1.77695
A	WT	1.77747
A	WT	1.77825
A	WT	1.77863
A	WT	1.77905
A	WT	1.7792
A	WT	1.77952
A	WT	1.7803
A	WT	1.78048
A	WT	1.78077
A	WT	1.78086
A	WT	1.78175
A	WT	1.78206
A	WT	1.78464
A	WT	1.78557
A	WT	1.786
A	WT	1.78667
A	WT	1.7872
A	WT	1.78726
A	WT	1.78822
A	WT	1.7884
A	WT	1.78847
A	WT	1.78991
A	WT	1.78993
A	WT	1.79065
A	WT	1.79115
A	WT	1.79245
A	WT	1.79261
A	WT	1.79333
A	WT	1.79579
A	WT	1.79612
A	WT	1.79682
A	WT	1.7973
A	WT	1.79858
A	WT	1.79964
A	WT	1.80134
A	WT	1.80156
A	WT	1.80173
A	WT	1.80342
A	WT	1.80373
A	WT	1.80503
A	WT	1.8052
A	WT	1.80544
A	WT	1.80559
A	WT	1.80568
A	WT	1.8067
A	WT	1.80698
A	WT	1.8075
A	WT	1.80901
A	WT	1.8096
A	WT	1.8104
A	WT	1.81042
A	WT	1.81123
A	WT	1.81199
A	WT	1.81223
A	WT	1.81259
A	WT	1.81362
A	WT	1.81404
A	WT	1.81474
A	WT	1.81496
A	WT	1.81616
A	WT	1.81663
A	WT	1.8171
A	WT	1.8186
A	WT	1.81925
A	WT	1.81943
A	WT	1.82093
A	WT	1.82116
A	WT	1.8229
A	WT	1.8255
A	WT	1.82723
A	WT	1.82758
A	WT	1.82828
A	WT	1.82848
A	WT	1.82968
A	WT	1.82973
A	WT	1.82983
A	WT	1.82984
A	WT	1.82991
A	WT	1.82995
A	WT	1.83065
A	WT	1.83098
A	WT	1.83308
A	WT	1.83371
A	WT	1.83413
A	WT	1.83427
A	WT	1.83502
A	WT	1.83525
A	WT	1.83646
A	WT	1.83673
A	WT	1.8373
A	WT	1.8396
A	WT	1.84111
A	WT	1.84117
A	WT	1.84167
A	WT	1.84173
A	WT	1.84223
A	WT	1.84308
A	WT	1.84419
A	WT	1.84435
A	WT	1.84474
A	WT	1.8461
A	WT	1.84657
A	WT	1.84662
A	WT	1.84774
A	WT	1.84834
A	WT	1.84843
A	WT	1.84879
A	WT	1.84899
A	WT	1.84928
A	WT	1.84959
A	WT	1.84982
A	WT	1.84985
A	WT	1.85066
A	WT	1.85097
A	WT	1.85182
A	WT	1.85387
A	WT	1.85429
A	WT	1.85461
A	WT	1.85539
A	WT	1.85647
A	WT	1.8566
A	WT	1.85668
A	WT	1.85695
A	WT	1.85868
A	WT	1.85888
A	WT	1.85948
A	WT	1.86118
A	WT	1.86153
A	WT	1.86283
A	WT	1.86335
A	WT	1.86395
A	WT	1.86415
A	WT	1.86535
A	WT	1.86746
A	WT	1.87363
A	WT	1.87446
A	WT	1.87642
A	WT	1.87739
A	WT	1.87812
A	WT	1.87881
A	WT	1.87994
A	WT	1.88101
A	WT	1.8818
A	WT	1.88245
A	WT	1.8825
A	WT	1.88265
A	WT	1.88446
A	WT	1.88489
A	WT	1.8855
A	WT	1.88582
A	WT	1.88759
A	WT	1.88866
A	WT	1.88955
A	WT	1.88956
A	WT	1.88976
A	WT	1.88979
A	WT	1.8901
A	WT	1.89061
A	WT	1.89124
A	WT	1.89136
A	WT	1.89221
A	WT	1.8924
A	WT	1.89284
A	WT	1.89291
A	WT	1.89383
A	WT	1.89458
A	WT	1.89465
A	WT	1.896
A	WT	1.89654
A	WT	1.8971
A	WT	1.89746
A	WT	1.89791
A	WT	1.89794
A	WT	1.90125
A	WT	1.90234
A	WT	1.90325
A	WT	1.90399
A	WT	1.90429
A	WT	1.90451
A	WT	1.90464
A	WT	1.90812
A	WT	1.90939
A	WT	1.9103
A	WT	1.91044
A	WT	1.91071
A	WT	1.91126
A	WT	1.9119
A	WT	1.91226
A	WT	1.91402
A	WT	1.91485
A	WT	1.9159
A	WT	1.91633
A	WT	1.91747
A	WT	1.91939
A	WT	1.91962
A	WT	1.92177
A	WT	1.92229
A	WT	1.92348
A	WT	1.9239
A	WT	1.92443
A	WT	1.92458
A	WT	1.92546
A	WT	1.926
A	WT	1.9261
A	WT	1.92649
A	WT	1.92702
A	WT	1.92718
A	WT	1.9279
A	WT	1.92811
A	WT	1.92883
A	WT	1.93112
A	WT	1.9315
A	WT	1.9331
A	WT	1.93312
A	WT	1.93399
A	WT	1.93686
A	WT	1.93866
A	WT	1.93925
A	WT	1.93959
A	WT	1.93965
A	WT	1.93978
A	WT	1.94025
A	WT	1.94164
A	WT	1.94395
A	WT	1.94408
A	WT	1.94594
A	WT	1.94705
A	WT	1.94768
A	WT	1.94814
A	WT	1.94881
A	WT	1.9491
A	WT	1.94959
A	WT	1.94995
A	WT	1.94996
A	WT	1.95001
A	WT	1.95066
A	WT	1.95149
A	WT	1.95153
A	WT	1.95169
A	WT	1.95316
A	WT	1.95396
A	WT	1.95575
A	WT	1.95587
A	WT	1.95668
A	WT	1.95792
A	WT	1.95871
A	WT	1.95916
A	WT	1.96057
A	WT	1.96105
A	WT	1.96132
A	WT	1.96353
A	WT	1.96497
A	WT	1.96606
A	WT	1.96627
A	WT	1.9673
A	WT	1.96805
A	WT	1.96869
A	WT	1.96877
A	WT	1.96998
A	WT	1.97076
A	WT	1.97356
A	WT	1.9741
A	WT	1.97412
A	WT	1.97612
A	WT	1.97689
A	WT	1.97719
A	WT	1.97795
A	WT	1.97855
A	WT	1.98254
A	WT	1.98293
A	WT	1.98361
A	WT	1.98413
A	WT	1.98535
A	WT	1.98542
A	WT	1.98585
A	WT	1.98706
A	WT	1.98738
A	WT	1.98854
A	WT	1.98871
A	WT	1.98891
A	WT	1.98944
A	WT	1.98969
A	WT	1.99005
A	WT	1.99071
A	WT	1.99106
A	WT	1.99265
A	WT	1.99274
A	WT	1.99281
A	WT	1.99301
A	WT	1.99416
A	WT	1.9948
A	WT	1.99515
A	WT	1.99561
A	WT	1.996
A	WT	1.99817
A	WT	1.99828
A	WT	1.99899
A	WT	1.99945
A	WT	2.00152
A	WT	2.00221
A	WT	2.00306
A	WT	2.0038
A	WT	2.00538
A	WT	2.00724
A	WT	2.00828
A	WT	2.00912
A	WT	2.0094
A	WT	2.01013
A	WT	2.01278
A	WT	2.01399
A	WT	2.01448
A	WT	2.017
A	WT	2.01807
A	WT	2.01888
A	WT	2.02018
A	WT	2.02028
A	WT	2.02093
A	WT	2.02161
A	WT	2.0226
A	WT	2.0254
A	WT	2.02563
A	WT	2.026
A	WT	2.02826
A	WT	2.02873
A	WT	2.02941
A	WT	2.03101
A	WT	2.03414
A	WT	2.03513
A	WT	2.03774
A	WT	2.03892
A	WT	2.03903
A	WT	2.04058
A	WT	2.04064
A	WT	2.04107
A	WT	2.04208
A	WT	2.04275
A	WT	2.04288
A	WT	2.04352
A	WT	2.044
A	WT	2.04472
A	WT	2.04803
A	WT	2.04868
A	WT	2.04926
A	WT	2.04977
A	WT	2.05077
A	WT	2.05461
A	WT	2.05562
A	WT	2.05584
A	WT	2.05637
A	WT	2.05728
A	WT	2.05807
A	WT	2.05829
A	WT	2.05853
A	WT	2.05906
A	WT	2.05943
A	WT	2.05963
A	WT	2.06167
A	WT	2.06248
A	WT	2.06629
A	WT	2.0666
A	WT	2.06755
A	WT	2.06845
A	WT	2.06875
A	WT	2.06913
A	WT	2.07145
A	WT	2.0757
A	WT	2.07617
A	WT	2.07712
A	WT	2.08083
A	WT	2.08248
A	WT	2.08328
A	WT	2.08357
A	WT	2.08603
A	WT	2.08703
A	WT	2.08853
A	WT	2.09013
A	WT	2.09102
A	WT	2.09103
A	WT	2.09106
A	WT	2.09284
A	WT	2.09645
A	WT	2.09707
A	WT	2.09907
A	WT	2.10094
A	WT	2.10183
A	WT	2.10288
A	WT	2.10508
A	WT	2.1067
A	WT	2.10701
A	WT	2.10885
A	WT	2.10898
A	WT	2.10922
A	WT	2.11066
A	WT	2.11152
A	WT	2.11187
A	WT	2.1123
A	WT	2.11299
A	WT	2.1131
A	WT	2.1134
A	WT	2.11379
A	WT	2.11415
A	WT	2.11468
A	WT	2.11536
A	WT	2.11566
A	WT	2.11613
A	WT	2.1193
A	WT	2.12025
A	WT	2.12097
A	WT	2.12175
A	WT	2.12254
A	WT	2.1229
A	WT	2.12346
A	WT	2.12637
A	WT	2.12672
A	WT	2.13272
A	WT	2.13324
A	WT	2.13356
A	WT	2.13372
A	WT	2.13393
A	WT	2.13448
A	WT	2.13534
A	WT	2.13602
A	WT	2.13652
A	WT	2.1375
A	WT	2.1389
A	WT	2.14006
A	WT	2.14024
A	WT	2.14144
A	WT	2.14179
A	WT	2.14278
A	WT	2.14294
A	WT	2.1433
A	WT	2.14367
A	WT	2.14487
A	WT	2.14629
A	WT	2.14727
A	WT	2.14924
A	WT	2.15138
A	WT	2.15178
A	WT	2.152
A	WT	2.15366
A	WT	2.15428
A	WT	2.15544
A	WT	2.15654
A	WT	2.15758
A	WT	2.15849
A	WT	2.1592
A	WT	2.15941
A	WT	2.15945
A	WT	2.15992
A	WT	2.16026
A	WT	2.16039
A	WT	2.16059
A	WT	2.16067
A	WT	2.16076
A	WT	2.1612
A	WT	2.16437
A	WT	2.16503
A	WT	2.16651
A	WT	2.16688
A	WT	2.1702
A	WT	2.17096
A	WT	2.1712
A	WT	2.17134
A	WT	2.17442
A	WT	2.17478
A	WT	2.17614
A	WT	2.17638
A	WT	2.1779
A	WT	2.17833
A	WT	2.18072
A	WT	2.1817
A	WT	2.18307
A	WT	2.18316
A	WT	2.18374
A	WT	2.18417
A	WT	2.18455
A	WT	2.18564
A	WT	2.18666
A	WT	2.18685
A	WT	2.1876
A	WT	2.18777
A	WT	2.18979
A	WT	2.19212
A	WT	2.1936
A	WT	2.19442
A	WT	2.19488
A	WT	2.19653
A	WT	2.19694
A	WT	2.19815
A	WT	2.19869
A	WT	2.19888
A	WT	2.19921
A	WT	2.19934
A	WT	2.20033
A	WT	2.20207
A	WT	2.20224
A	WT	2.20413
A	WT	2.20438
A	WT	2.20825
A	WT	2.21479
A	WT	2.21657
A	WT	2.21689
A	WT	2.21935
A	WT	2.21947
A	WT	2.22079
A	WT	2.22173
A	WT	2.22292
A	WT	2.22308
A	WT	2.22431
A	WT	2.22436
A	WT	2.22474
A	WT	2.22741
A	WT	2.23176
A	WT	2.23208
A	WT	2.23209
A	WT	2.23478
A	WT	2.23575
A	WT	2.23743
A	WT	2.23861
A	WT	2.24013
A	WT	2.24072
A	WT	2.24081
A	WT	2.24101
A	WT	2.24247
A	WT	2.24387
A	WT	2.24565
A	WT	2.2467
A	WT	2.24767
A	WT	2.24874
A	WT	2.24969
A	WT	2.25049
A	WT	2.25082
A	WT	2.25286
A	WT	2.25301
A	WT	2.25751
A	WT	2.25825
A	WT	2.25904
A	WT	2.25974
A	WT	2.26298
A	WT	2.26312
A	WT	2.26435
A	WT	2.26589
A	WT	2.26937
A	WT	2.27092
A	WT	2.27429
A	WT	2.27516
A	WT	2.27752
A	WT	2.27768
A	WT	2.27855
A	WT	2.2799
A	WT	2.28002
A	WT	2.28016
A	WT	2.28018
A	WT	2.28237
A	WT	2.28375
A	WT	2.28469
A	WT	2.28521
A	WT	2.28615
A	WT	2.28834
A	WT	2.28843
A	WT	2.28844
A	WT	2.2891
A	WT	2.29294
A	WT	2.29371
A	WT	2.2949
A	WT	2.29704
A	WT	2.29712
A	WT	2.2987
A	WT	2.30008
A	WT	2.30069
A	WT	2.30376
A	WT	2.30653
A	WT	2.30739
A	WT	2.31118
A	WT	2.31122
A	WT	2.31222
A	WT	2.31328
A	WT	2.31512
A	WT	2.3158
A	WT	2.31638
A	WT	2.32281
A	WT	2.32299
A	WT	2.32312
A	WT	2.32491
A	WT	2.32571
A	WT	2.32924
A	WT	2.3294
A	WT	2.32964
A	WT	2.33093
A	WT	2.33254
A	WT	2.3327
A	WT	2.3332
A	WT	2.33362
A	WT	2.33523
A	WT	2.33617
A	WT	2.33685
A	WT	2.34326
A	WT	2.34463
A	WT	2.3457
A	WT	2.34756
A	WT	2.34775
A	WT	2.34906
A	WT	2.35096
A	WT	2.35765
A	WT	2.3583
A	WT	2.36036
A	WT	2.36095
A	WT	2.36101
A	WT	2.36364
A	WT	2.36494
A	WT	2.36569
A	WT	2.36982
A	WT	2.37371
A	WT	2.37387
A	WT	2.37564
A	WT	2.3843
A	WT	2.38524
A	WT	2.38685
A	WT	2.3871
A	WT	2.38859
A	WT	2.38956
A	WT	2.38983
A	WT	2.39052
A	WT	2.39231
A	WT	2.39341
A	WT	2.39736
A	WT	2.39771
A	WT	2.39827
A	WT	2.39835
A	WT	2.40244
A	WT	2.40672
A	WT	2.41178
A	WT	2.41236
A	WT	2.41338
A	WT	2.41412
A	WT	2.4145
A	WT	2.4151
A	WT	2.41614
A	WT	2.41659
A	WT	2.41874
A	WT	2.42825
A	WT	2.43128
A	WT	2.43179
A	WT	2.43621
A	WT	2.43661
A	WT	2.43882
A	WT	2.43983
A	WT	2.444
A	WT	2.44441
A	WT	2.44798
A	WT	2.44819
A	WT	2.44973
A	WT	2.4528
A	WT	2.45621
A	WT	2.45814
A	WT	2.46541
A	WT	2.46551
A	WT	2.46723
A	WT	2.468
A	WT	2.4687
A	WT	2.47186
A	WT	2.47307
A	WT	2.47852
A	WT	2.48066
A	WT	2.48085
A	WT	2.48618
A	WT	2.48655
A	WT	2.48882
A	WT	2.49191
A	WT	2.494
A	WT	2.49634
A	WT	2.49913
A	WT	2.50008
A	WT	2.50068
A	WT	2.50091
A	WT	2.5033
A	WT	2.50657
A	WT	2.50881
A	WT	2.5115
A	WT	2.51286
A	WT	2.51404
A	WT	2.51678
A	WT	2.51891
A	WT	2.52045
A	WT	2.52202
A	WT	2.52209
A	WT	2.52465
A	WT	2.52816
A	WT	2.53158
A	WT	2.53587
A	WT	2.53672
A	WT	2.53843
A	WT	2.54065
A	WT	2.545
A	WT	2.55286
A	WT	2.55455
A	WT	2.55703
A	WT	2.56026
A	WT	2.56652
A	WT	2.5705
A	WT	2.57058
A	WT	2.57092
A	WT	2.5715
A	WT	2.57208
A	WT	2.57258
A	WT	2.57507
A	WT	2.57702
A	WT	2.57881
A	WT	2.58221
A	WT	2.58952
A	WT	2.59199
A	WT	2.59685
A	WT	2.597
A	WT	2.59928
A	WT	2.61386
A	WT	2.61545
A	WT	2.61704
A	WT	2.62256
A	WT	2.62369
A	WT	2.62683
A	WT	2.63101
A	WT	2.63215
A	WT	2.6323
A	WT	2.63459
A	WT	2.63568
A	WT	2.6383
A	WT	2.6406
A	WT	2.64111
A	WT	2.64268
A	WT	2.65021
A	WT	2.65252
A	WT	2.65574
A	WT	2.65743
A	WT	2.65809
A	WT	2.66347
A	WT	2.66724
A	WT	2.66914
A	WT	2.68204
A	WT	2.68398
A	WT	2.6887
A	WT	2.70391
A	WT	2.71253
A	WT	2.74319
A	WT	2.74796
A	WT	2.75093
A	WT	2.75564
A	WT	2.7648
A	WT	2.77048
A	WT	2.77349
A	WT	2.77435
A	WT	2.77982
A	WT	2.78901
A	WT	2.78923
A	WT	2.82331
A	WT	2.82759
A	WT	2.83437
A	WT	2.83913
A	WT	2.8512
A	WT	2.85898
A	WT	2.8674
A	WT	2.88185
A	WT	2.88418
A	WT	2.90661
A	WT	2.90928
A	WT	2.91124
A	WT	2.92161
A	WT	2.98187
A	WT	2.98333
A	WT	2.99213
A	WT	2.99306
A	WT	3.02631
A	WT	3.0582
A	WT	3.06264
A	WT	3.07325
A	WT	3.09813
A	WT	3.10117
A	WT	3.10437
A	WT	3.12839
A	WT	3.17568
A	WT	3.1848
A	WT	3.25827
A	WT	3.28507
A	WT	3.35327
A	WT	3.42217
A	WT	3.54477
A	WT	3.58577
A	WT	3.62548
B	WT	1.2741
B	WT	1.28515
B	WT	1.28704
B	WT	1.28931
B	WT	1.33338
B	WT	1.33749
B	WT	1.33893
B	WT	1.34556
B	WT	1.34801
B	WT	1.35598
B	WT	1.36122
B	WT	1.3676
B	WT	1.37008
B	WT	1.37122
B	WT	1.37317
B	WT	1.37767
B	WT	1.39503
B	WT	1.3987
B	WT	1.40098
B	WT	1.40343
B	WT	1.40387
B	WT	1.41108
B	WT	1.41311
B	WT	1.41389
B	WT	1.41422
B	WT	1.41501
B	WT	1.41678
B	WT	1.41888
B	WT	1.43585
B	WT	1.44686
B	WT	1.4503
B	WT	1.45328
B	WT	1.45454
B	WT	1.45627
B	WT	1.46908
B	WT	1.47127
B	WT	1.47161
B	WT	1.47183
B	WT	1.47761
B	WT	1.47961
B	WT	1.48085
B	WT	1.482
B	WT	1.48242
B	WT	1.48801
B	WT	1.48806
B	WT	1.49428
B	WT	1.49636
B	WT	1.49957
B	WT	1.50383
B	WT	1.50931
B	WT	1.50937
B	WT	1.51086
B	WT	1.51098
B	WT	1.51151
B	WT	1.51267
B	WT	1.51311
B	WT	1.51754
B	WT	1.51902
B	WT	1.52029
B	WT	1.52311
B	WT	1.52358
B	WT	1.52404
B	WT	1.53931
B	WT	1.54168
B	WT	1.54235
B	WT	1.54295
B	WT	1.5489
B	WT	1.5545
B	WT	1.55617
B	WT	1.55976
B	WT	1.56255
B	WT	1.56736
B	WT	1.56926
B	WT	1.57525
B	WT	1.5799
B	WT	1.58406
B	WT	1.58636
B	WT	1.58767
B	WT	1.58984
B	WT	1.58993
B	WT	1.59011
B	WT	1.59122
B	WT	1.59215
B	WT	1.59302
B	WT	1.5931
B	WT	1.59324
B	WT	1.59369
B	WT	1.59549
B	WT	1.59756
B	WT	1.59998
B	WT	1.60308
B	WT	1.60768
B	WT	1.60829
B	WT	1.61587
B	WT	1.62095
B	WT	1.62219
B	WT	1.62246
B	WT	1.62287
B	WT	1.63248
B	WT	1.63454
B	WT	1.63672
B	WT	1.6392
B	WT	1.63934
B	WT	1.64411
B	WT	1.64705
B	WT	1.65163
B	WT	1.65247
B	WT	1.65282
B	WT	1.65622
B	WT	1.65772
B	WT	1.6582
B	WT	1.65851
B	WT	1.66045
B	WT	1.66399
B	WT	1.6648
B	WT	1.66485
B	WT	1.66706
B	WT	1.66747
B	WT	1.66826
B	WT	1.67382
B	WT	1.68444
B	WT	1.68744
B	WT	1.69098
B	WT	1.69577
B	WT	1.69726
B	WT	1.70014
B	WT	1.70111
B	WT	1.7024
B	WT	1.70626
B	WT	1.70695
B	WT	1.70835
B	WT	1.70861
B	WT	1.70998
B	WT	1.7139
B	WT	1.72106
B	WT	1.72348
B	WT	1.72456
B	WT	1.72476
B	WT	1.72738
B	WT	1.72915
B	WT	1.73192
B	WT	1.73274
B	WT	1.73382
B	WT	1.73409
B	WT	1.73745
B	WT	1.73912
B	WT	1.73938
B	WT	1.74436
B	WT	1.74747
B	WT	1.7475
B	WT	1.74866
B	WT	1.75012
B	WT	1.75034
B	WT	1.75203
B	WT	1.75976
B	WT	1.76088
B	WT	1.76937
B	WT	1.77099
B	WT	1.77622
B	WT	1.77692
B	WT	1.77708
B	WT	1.77887
B	WT	1.78284
B	WT	1.78321
B	WT	1.78521
B	WT	1.7854
B	WT	1.78712
B	WT	1.78828
B	WT	1.7895
B	WT	1.80052
B	WT	1.801
B	WT	1.8038
B	WT	1.80492
B	WT	1.80524
B	WT	1.80609
B	WT	1.80723
B	WT	1.81895
B	WT	1.82207
B	WT	1.82239
B	WT	1.82487
B	WT	1.82828
B	WT	1.82933
B	WT	1.8318
B	WT	1.83301
B	WT	1.83924
B	WT	1.84584
B	WT	1.84728
B	WT	1.84883
B	WT	1.85069
B	WT	1.85121
B	WT	1.85242
B	WT	1.85559
B	WT	1.85664
B	WT	1.85778
B	WT	1.85888
B	WT	1.86278
B	WT	1.86495
B	WT	1.86732
B	WT	1.87028
B	WT	1.87112
B	WT	1.87155
B	WT	1.875
B	WT	1.87921
B	WT	1.88015
B	WT	1.88051
B	WT	1.88237
B	WT	1.88483
B	WT	1.89352
B	WT	1.89395
B	WT	1.89506
B	WT	1.89606
B	WT	1.89773
B	WT	1.90529
B	WT	1.90593
B	WT	1.91192
B	WT	1.91482
B	WT	1.91646
B	WT	1.91718
B	WT	1.91908
B	WT	1.92115
B	WT	1.9216
B	WT	1.9258
B	WT	1.92739
B	WT	1.93147
B	WT	1.93161
B	WT	1.93498
B	WT	1.93857
B	WT	1.94143
B	WT	1.947
B	WT	1.96447
B	WT	1.96487
B	WT	1.96563
B	WT	1.96608
B	WT	1.96762
B	WT	1.9684
B	WT	1.97778
B	WT	1.97903
B	WT	1.98183
B	WT	1.98729
B	WT	2.00096
B	WT	2.0047
B	WT	2.01372
B	WT	2.01731
B	WT	2.02513
B	WT	2.0307
B	WT	2.03192
B	WT	2.03299
B	WT	2.03496
B	WT	2.03783
B	WT	2.03852
B	WT	2.04146
B	WT	2.0444
B	WT	2.04603
B	WT	2.04643
B	WT	2.05249
B	WT	2.05854
B	WT	2.05932
B	WT	2.05973
B	WT	2.05975
B	WT	2.05978
B	WT	2.06333
B	WT	2.06637
B	WT	2.06942
B	WT	2.06946
B	WT	2.07266
B	WT	2.07357
B	WT	2.07434
B	WT	2.08007
B	WT	2.08127
B	WT	2.08239
B	WT	2.0826
B	WT	2.08644
B	WT	2.10259
B	WT	2.10364
B	WT	2.10668
B	WT	2.1132
B	WT	2.11838
B	WT	2.12341
B	WT	2.12703
B	WT	2.13508
B	WT	2.14466
B	WT	2.14694
B	WT	2.15337
B	WT	2.16094
B	WT	2.16285
B	WT	2.17076
B	WT	2.17486
B	WT	2.19955
B	WT	2.20369
B	WT	2.21189
B	WT	2.21267
B	WT	2.2194
B	WT	2.22327
B	WT	2.22367
B	WT	2.22695
B	WT	2.24617
B	WT	2.25008
B	WT	2.27364
B	WT	2.27839
B	WT	2.28267
B	WT	2.28369
B	WT	2.28485
B	WT	2.28862
B	WT	2.29037
B	WT	2.2907
B	WT	2.29152
B	WT	2.29238
B	WT	2.29866
B	WT	2.30139
B	WT	2.32639
B	WT	2.33467
B	WT	2.34078
B	WT	2.35659
B	WT	2.35828
B	WT	2.35966
B	WT	2.37146
B	WT	2.37888
B	WT	2.38251
B	WT	2.38266
B	WT	2.38847
B	WT	2.41309
B	WT	2.42653
B	WT	2.44154
B	WT	2.44448
B	WT	2.44709
B	WT	2.46047
B	WT	2.46178
B	WT	2.4722
B	WT	2.47556
B	WT	2.48058
B	WT	2.48211
B	WT	2.51597
B	WT	2.51619
B	WT	2.53587
B	WT	2.54251
B	WT	2.54602
B	WT	2.54603
B	WT	2.55403
B	WT	2.56084
B	WT	2.60267
B	WT	2.60782
B	WT	2.65288
B	WT	2.67845
B	WT	2.68397
B	WT	2.68831
B	WT	2.69445
B	WT	2.72497
B	WT	2.72915
B	WT	2.76047
B	WT	2.79012
B	WT	2.80254
B	WT	2.85838
B	WT	2.86041
B	WT	2.90039
B	WT	2.95932
C	WT	2.16943
C	WT	2.07767
C	WT	1.8689
C	WT	2.3314
C	WT	2.16625
C	WT	2.48382
C	WT	1.87921
C	WT	3.031
C	WT	2.22835
C	WT	1.80956
C	WT	2.49636
C	WT	2.09732
C	WT	2.57804
C	WT	1.51089
C	WT	2.58627
C	WT	1.6818
C	WT	3.02892
C	WT	1.65068
C	WT	1.85497
C	WT	2.34139
C	WT	2.3293
C	WT	3.08599
C	WT	1.70792
C	WT	2.36039
C	WT	1.82338
C	WT	2.00921
C	WT	2.91447
C	WT	1.59941
C	WT	2.09496
C	WT	2.54222
C	WT	2.64008
C	WT	2.74682
C	WT	2.65787
C	WT	2.18934
C	WT	3.38552
C	WT	1.65178
C	WT	1.55045
C	WT	2.24124
C	WT	2.36007
C	WT	1.78273
C	WT	1.5904
C	WT	1.66198
C	WT	1.71877
C	WT	1.9667
C	WT	2.06565
C	WT	1.52941
C	WT	1.81407
C	WT	1.5967
C	WT	1.75471
C	WT	2.72773
C	WT	1.7988
C	WT	2.04273
C	WT	1.80624
C	WT	2.54953
C	WT	2.35563
C	WT	2.32131
C	WT	1.50522
C	WT	1.67582
C	WT	1.80481
C	WT	2.34015
C	WT	2.27535
C	WT	2.44201
C	WT	2.02951
C	WT	1.88006
C	WT	2.08375
C	WT	2.12383
C	WT	2.03306
C	WT	1.69858
C	WT	3.09361
C	WT	1.85112
C	WT	2.83571
C	WT	1.74022
C	WT	1.77955
C	WT	2.12891
C	WT	2.50061
C	WT	1.5514
C	WT	1.95164
C	WT	2.23265
C	WT	2.29332
C	WT	1.62937
C	WT	1.88025
C	WT	2.46863
C	WT	2.10915
C	WT	2.34121
C	WT	1.76515
C	WT	1.60562
C	WT	1.73327
C	WT	1.77901
C	WT	2.02601
C	WT	1.49529
C	WT	2.74821
C	WT	2.22924
C	WT	1.4627
C	WT	1.96417
C	WT	1.95617
C	WT	2.06565
C	WT	1.54464
C	WT	2.3688
C	WT	2.05463
C	WT	1.86816
C	WT	2.80269
C	WT	1.9372
C	WT	1.92819
C	WT	1.99855
C	WT	2.0271
C	WT	2.48983
C	WT	3.04505
C	WT	1.79031
C	WT	3.29017
C	WT	1.91108
C	WT	2.51865
C	WT	1.66505
C	WT	1.69503
C	WT	2.21555
C	WT	2.67904
C	WT	1.94389
C	WT	1.90836
C	WT	1.78462
C	WT	1.62887
C	WT	1.67088
C	WT	2.04192
C	WT	2.24475
C	WT	2.05657
C	WT	1.92292
C	WT	2.51543
C	WT	1.69291
C	WT	1.71189
C	WT	2.31969
C	WT	1.67577
C	WT	1.95933
C	WT	2.09258
C	WT	1.7177
C	WT	2.68578
C	WT	2.51106
C	WT	2.89842
C	WT	1.81604
C	WT	2.01221
C	WT	1.94388
C	WT	2.75648
C	WT	1.61748
C	WT	2.23417
C	WT	2.83499
C	WT	2.01988
C	WT	1.96597
C	WT	1.63808
C	WT	1.92134
C	WT	2.10445
C	WT	2.72153
C	WT	2.3468
C	WT	2.25249
C	WT	2.92611
C	WT	1.75623
C	WT	1.89931
C	WT	1.56899
C	WT	2.31304
C	WT	2.44718
C	WT	1.99936
C	WT	2.73852
C	WT	2.39565
C	WT	2.25292
C	WT	1.85921
C	WT	1.78429
C	WT	2.60245
C	WT	2.02281
C	WT	2.25154
C	WT	1.9925
C	WT	1.84772
C	WT	2.00381
C	WT	2.06171
C	WT	3.20782
C	WT	1.9122
C	WT	2.74985
C	WT	2.56873
C	WT	2.06196
C	WT	2.36264
C	WT	2.69368
C	WT	2.5309
C	WT	1.84253
C	WT	2.30099
C	WT	1.68253
C	WT	1.65167
C	WT	1.9011
C	WT	2.18631
C	WT	3.30505
C	WT	1.58166
C	WT	2.54813
C	WT	1.68562
C	WT	1.77583
C	WT	2.3279
C	WT	1.58616
C	WT	2.77213
C	WT	2.20934
C	WT	2.14689
C	WT	3.08356
C	WT	3.01988
C	WT	1.65831
C	WT	1.8849
C	WT	2.93563
C	WT	1.91304
C	WT	1.76942
C	WT	1.74348
C	WT	1.93336
C	WT	3.07865
C	WT	2.47494
C	WT	2.21898
C	WT	2.27909
C	WT	1.61635
C	WT	1.61437
C	WT	1.69454
C	WT	1.83967
C	WT	1.93902
C	WT	2.31525
C	WT	2.92555
C	WT	2.13358
C	WT	1.80808
C	WT	2.1174
C	WT	1.95905
C	WT	2.0388
C	WT	1.83246
C	WT	1.44096
C	WT	2.1282
C	WT	1.39087
C	WT	1.71935
C	WT	1.59975
C	WT	2.26527
C	WT	1.95771
C	WT	1.97833
C	WT	1.6322
C	WT	1.84358
C	WT	3.3068
C	WT	2.21887
C	WT	1.97208
C	WT	2.33889
C	WT	1.63703
C	WT	2.3671
C	WT	2.28474
C	WT	2.39859
C	WT	2.46501
C	WT	3.19177
C	WT	1.85591
C	WT	1.52257
C	WT	2.73461
C	WT	2.85879
C	WT	1.81501
C	WT	2.89045
C	WT	1.97084
C	WT	1.68755
C	WT	1.69727
C	WT	2.2759
C	WT	1.88239
C	WT	2.38889
C	WT	1.84526
C	WT	1.92902
C	WT	1.81406
C	WT	1.8609
C	WT	2.03499
C	WT	2.35475
C	WT	2.38573
C	WT	1.518
C	WT	2.39489
C	WT	2.02131
C	WT	2.37996
C	WT	2.26665
C	WT	2.12159
C	WT	1.79332
C	WT	1.72343
C	WT	2.15236
C	WT	2.25553
C	WT	1.8866
C	WT	1.62515
C	WT	2.34409
C	WT	1.84838
C	WT	1.88623
C	WT	2.79884
C	WT	2.42933
C	WT	1.87962
C	WT	1.65332
C	WT	1.81548
C	WT	1.84729
C	WT	2.08862
C	WT	2.43202
C	WT	2.62323
C	WT	2.05687
C	WT	2.14108
C	WT	3.13764
C	WT	2.49646
C	WT	1.93292
C	WT	2.29181
C	WT	1.71998
C	WT	2.59595
C	WT	2.59624
C	WT	1.78007
C	WT	1.84575
[truncated: 13,289 more rows]
[truncated: 2 more columns]

## Sheet: width
Replicate	Strain	Width
A	WT	0.666062
A	WT	0.666988
A	WT	0.659458
A	WT	0.709822
A	WT	0.536132
A	WT	0.684568
A	WT	0.5277
A	WT	0.624988
A	WT	0.743577
A	WT	0.727067
A	WT	0.625385
A	WT	0.619338
A	WT	0.700324
A	WT	0.60749
A	WT	0.754139
A	WT	0.631264
A	WT	0.665521
A	WT	0.628134
A	WT	0.523825
A	WT	0.598605
A	WT	0.634959
A	WT	0.713099
A	WT	0.736764
A	WT	0.76635
A	WT	0.732423
A	WT	0.626655
A	WT	0.668676
A	WT	0.717972
A	WT	0.7734
A	WT	0.588028
A	WT	0.691179
A	WT	0.748638
A	WT	0.744596
A	WT	0.6192
A	WT	0.776196
A	WT	0.749545
A	WT	0.693106
A	WT	0.592043
A	WT	0.679626
A	WT	0.706727
A	WT	0.627013
A	WT	0.800038
A	WT	0.723218
A	WT	0.782262
A	WT	0.745875
A	WT	0.827333
A	WT	0.700752
A	WT	0.627558
A	WT	0.690118
A	WT	0.615083
A	WT	0.58566
A	WT	0.66311
A	WT	0.722641
A	WT	0.62044
A	WT	0.614237
A	WT	0.70303
A	WT	0.684505
A	WT	0.640462
A	WT	0.597889
A	WT	0.703698
A	WT	0.603108
A	WT	0.528566
A	WT	0.600668
A	WT	0.51325
A	WT	0.556014
A	WT	0.704941
A	WT	0.654889
A	WT	0.645797
A	WT	0.666593
A	WT	0.687424
A	WT	0.607321
A	WT	0.631458
A	WT	0.681292
A	WT	0.663091
A	WT	0.6847
A	WT	0.593172
A	WT	0.687143
A	WT	0.66256
A	WT	0.751824
A	WT	0.73926
A	WT	0.673644
A	WT	0.766948
A	WT	0.758938
A	WT	0.762042
A	WT	0.719784
A	WT	0.660146
A	WT	0.533334
A	WT	0.659443
A	WT	0.680568
A	WT	0.721625
A	WT	0.699103
A	WT	0.636756
A	WT	0.473367
A	WT	0.709821
A	WT	0.489209
A	WT	0.754028
A	WT	0.444028
A	WT	0.711484
A	WT	0.488387
A	WT	0.530649
A	WT	0.70954
A	WT	0.688216
A	WT	0.683022
A	WT	0.737209
A	WT	0.780588
A	WT	0.744898
A	WT	0.621607
A	WT	0.826758
A	WT	0.806333
A	WT	0.745759
A	WT	0.496171
A	WT	0.440007
A	WT	0.591386
A	WT	0.673318
A	WT	0.76801
A	WT	0.483347
A	WT	0.630308
A	WT	0.664545
A	WT	0.753239
A	WT	0.612895
A	WT	0.631309
A	WT	0.64721
A	WT	0.68601
A	WT	0.587394
A	WT	0.590449
A	WT	0.657489
A	WT	0.756409
A	WT	0.673607
A	WT	0.459314
A	WT	0.678804
A	WT	0.769075
A	WT	0.713289
A	WT	0.70675
A	WT	0.702023
A	WT	0.744954
A	WT	0.716815
A	WT	0.735574
A	WT	0.68587
A	WT	0.654342
A	WT	0.502218
A	WT	0.699559
A	WT	0.660899
A	WT	0.769807
A	WT	0.79583
A	WT	0.724048
A	WT	0.785233
A	WT	0.483398
A	WT	0.783654
A	WT	0.767564
A	WT	0.636564
A	WT	0.70806
A	WT	0.570671
A	WT	0.609661
A	WT	0.673224
A	WT	0.509923
A	WT	0.727605
A	WT	0.772529
A	WT	0.697531
A	WT	0.690383
A	WT	0.798197
A	WT	0.617726
A	WT	0.550993
A	WT	0.753491
A	WT	0.4979
A	WT	0.550711
A	WT	0.658949
A	WT	0.731007
A	WT	0.760059
A	WT	0.655291
A	WT	0.725314
A	WT	0.593051
A	WT	0.674087
A	WT	0.637676
A	WT	0.565459
A	WT	0.672643
A	WT	0.571322
A	WT	0.604164
A	WT	0.753658
A	WT	0.833882
A	WT	0.723791
A	WT	0.520402
A	WT	0.571927
A	WT	0.704675
A	WT	0.756567
A	WT	0.633108
A	WT	0.603427
A	WT	0.783493
A	WT	0.67718
A	WT	0.656357
A	WT	0.786403
A	WT	0.587606
A	WT	0.649585
A	WT	0.777717
A	WT	0.522425
A	WT	0.677086
A	WT	0.739698
A	WT	0.770276
A	WT	0.672674
A	WT	0.668038
A	WT	0.8049
A	WT	0.641049
A	WT	0.667954
A	WT	0.592692
A	WT	0.783986
A	WT	0.63337
A	WT	0.682065
A	WT	0.611884
A	WT	0.620043
A	WT	0.75908
A	WT	0.789638
A	WT	0.637599
A	WT	0.665875
A	WT	0.676899
A	WT	0.722029
A	WT	0.535868
A	WT	0.515554
A	WT	0.700649
A	WT	0.674313
A	WT	0.654246
A	WT	0.692701
A	WT	0.703159
A	WT	0.636473
A	WT	0.668266
A	WT	0.668293
A	WT	0.711937
A	WT	0.593547
A	WT	0.614002
A	WT	0.688395
A	WT	0.640001
A	WT	0.715805
A	WT	0.61771
A	WT	0.703757
A	WT	0.66967
A	WT	0.696381
A	WT	0.719754
A	WT	0.82433
A	WT	0.731518
A	WT	0.799202
A	WT	0.468015
A	WT	0.503688
A	WT	0.529531
A	WT	0.676112
A	WT	0.576886
A	WT	0.667207
A	WT	0.715715
A	WT	0.778133
A	WT	0.807826
A	WT	0.644627
A	WT	0.485792
A	WT	0.669757
A	WT	0.751124
A	WT	0.633506
A	WT	0.71501
A	WT	0.730906
A	WT	0.751519
A	WT	0.697296
A	WT	0.667484
A	WT	0.714853
A	WT	0.694348
A	WT	0.749943
A	WT	0.657263
A	WT	0.708692
A	WT	0.619053
A	WT	0.655026
A	WT	0.733449
A	WT	0.637476
A	WT	0.744247
A	WT	0.702835
A	WT	0.534008
A	WT	0.589902
A	WT	0.496607
A	WT	0.732395
A	WT	0.733751
A	WT	0.735998
A	WT	0.654661
A	WT	0.688655
A	WT	0.584248
A	WT	0.69237
A	WT	0.683951
A	WT	0.781596
A	WT	0.542611
A	WT	0.617984
A	WT	0.629405
A	WT	0.558535
A	WT	0.636425
A	WT	0.766161
A	WT	0.74019
A	WT	0.573141
A	WT	0.541896
A	WT	0.620667
A	WT	0.609211
A	WT	0.711628
A	WT	0.707331
A	WT	0.657476
A	WT	0.703043
A	WT	0.766756
A	WT	0.788187
A	WT	0.546494
A	WT	0.725173
A	WT	0.676104
A	WT	0.790374
A	WT	0.649372
A	WT	0.513214
A	WT	0.691569
A	WT	0.540739
A	WT	0.604923
A	WT	0.669734
A	WT	0.50082
A	WT	0.692695
A	WT	0.511003
A	WT	0.724554
A	WT	0.523302
A	WT	0.548353
A	WT	0.551434
A	WT	0.763883
A	WT	0.527015
A	WT	0.716496
A	WT	0.78137
A	WT	0.586029
A	WT	0.794674
A	WT	0.532469
A	WT	0.417058
A	WT	0.44788
A	WT	0.718137
A	WT	0.74921
A	WT	0.700541
A	WT	0.798259
A	WT	0.587292
A	WT	0.639542
A	WT	0.50473
A	WT	0.663619
A	WT	0.459488
A	WT	0.735915
A	WT	0.467257
A	WT	0.582908
A	WT	0.675856
A	WT	0.548686
A	WT	0.570134
A	WT	0.645223
A	WT	0.752809
A	WT	0.687735
A	WT	0.77542
A	WT	0.644775
A	WT	0.675794
A	WT	0.528777
A	WT	0.654984
A	WT	0.705978
A	WT	0.620355
A	WT	0.609444
A	WT	0.702257
A	WT	0.574273
A	WT	0.679553
A	WT	0.3948
A	WT	0.434496
A	WT	0.579503
A	WT	0.781231
A	WT	0.62846
A	WT	0.64434
A	WT	0.708765
A	WT	0.728508
A	WT	0.638824
A	WT	0.716808
A	WT	0.64884
A	WT	0.573323
A	WT	0.73406
A	WT	0.729765
A	WT	0.708424
A	WT	0.824686
A	WT	0.693797
A	WT	0.613489
A	WT	0.757281
A	WT	0.638076
A	WT	0.809198
A	WT	0.755151
A	WT	0.575712
A	WT	0.807444
A	WT	0.474958
A	WT	0.708177
A	WT	0.688253
A	WT	0.692308
A	WT	0.64187
A	WT	0.411809
A	WT	0.448258
A	WT	0.539682
A	WT	0.580221
A	WT	0.634934
A	WT	0.712015
A	WT	0.592069
A	WT	0.639647
A	WT	0.577041
A	WT	0.61403
A	WT	0.613321
A	WT	0.623662
A	WT	0.565608
A	WT	0.690191
A	WT	0.662716
A	WT	0.631931
A	WT	0.51143
A	WT	0.607783
A	WT	0.519793
A	WT	0.449441
A	WT	0.531875
A	WT	0.566767
A	WT	0.482586
A	WT	0.717317
A	WT	0.510702
A	WT	0.519855
A	WT	0.44096
A	WT	0.679183
A	WT	0.535853
A	WT	0.717571
A	WT	0.597457
A	WT	0.677809
A	WT	0.590575
A	WT	0.523637
A	WT	0.596475
A	WT	0.531037
A	WT	0.545813
A	WT	0.528099
A	WT	0.543398
A	WT	0.748253
A	WT	0.640186
A	WT	0.603663
A	WT	0.738825
A	WT	0.502036
A	WT	0.758488
A	WT	0.751363
A	WT	0.581254
A	WT	0.763156
A	WT	0.72764
A	WT	0.637477
A	WT	0.534761
A	WT	0.751441
A	WT	0.5033
A	WT	0.56745
A	WT	0.611507
A	WT	0.67334
A	WT	0.552053
A	WT	0.75261
A	WT	0.766949
A	WT	0.585763
A	WT	0.776977
A	WT	0.590463
A	WT	0.646626
A	WT	0.580178
A	WT	0.697907
A	WT	0.667915
A	WT	0.49436
A	WT	0.703582
A	WT	0.655665
A	WT	0.723931
A	WT	0.616856
A	WT	0.484102
A	WT	0.583501
A	WT	0.704636
A	WT	0.684379
A	WT	0.616341
A	WT	0.708891
A	WT	0.580607
A	WT	0.644507
A	WT	0.69059
A	WT	0.645368
A	WT	0.548225
A	WT	0.719482
A	WT	0.646465
A	WT	0.613404
A	WT	0.569642
A	WT	0.858326
A	WT	0.481978
A	WT	0.653105
A	WT	0.61331
A	WT	0.714434
A	WT	0.701206
A	WT	0.498934
A	WT	0.705769
A	WT	0.774404
A	WT	0.589351
A	WT	0.461679
A	WT	0.698889
A	WT	0.71458
A	WT	0.647572
A	WT	0.747954
A	WT	0.605361
A	WT	0.595118
A	WT	0.528138
A	WT	0.510602
A	WT	0.60024
A	WT	0.731003
A	WT	0.523487
A	WT	0.531356
A	WT	0.484665
A	WT	0.760787
A	WT	0.717994
A	WT	0.631463
A	WT	0.674856
A	WT	0.625448
A	WT	0.632507
A	WT	0.433186
A	WT	0.405524
A	WT	0.612734
A	WT	0.570964
A	WT	0.748276
A	WT	0.493031
A	WT	0.678217
A	WT	0.72136
A	WT	0.560218
A	WT	0.600448
A	WT	0.731503
A	WT	0.574964
A	WT	0.486596
A	WT	0.737132
A	WT	0.601977
A	WT	0.505472
A	WT	0.593183
A	WT	0.48585
A	WT	0.694197
A	WT	0.683111
A	WT	0.741867
A	WT	0.586026
A	WT	0.743863
A	WT	0.715122
A	WT	0.609763
A	WT	0.704528
A	WT	0.608138
A	WT	0.5119
A	WT	0.784863
A	WT	0.624931
A	WT	0.721132
A	WT	0.604809
A	WT	0.595511
A	WT	0.755426
A	WT	0.579124
A	WT	0.593558
A	WT	0.820561
A	WT	0.550434
A	WT	0.709922
A	WT	0.59775
A	WT	0.803466
A	WT	0.622484
A	WT	0.618542
A	WT	0.604728
A	WT	0.647832
A	WT	0.751101
A	WT	0.608563
A	WT	0.468594
A	WT	0.730826
A	WT	0.51018
A	WT	0.554154
A	WT	0.561898
A	WT	0.535722
A	WT	0.554453
A	WT	0.488368
A	WT	0.642109
A	WT	0.777745
A	WT	0.501143
A	WT	0.74332
A	WT	0.523779
A	WT	0.594559
A	WT	0.600576
A	WT	0.592628
A	WT	0.761517
A	WT	0.581627
A	WT	0.652303
A	WT	0.613061
A	WT	0.55324
A	WT	0.745724
A	WT	0.589602
A	WT	0.618081
A	WT	0.660367
A	WT	0.55266
A	WT	0.502385
A	WT	0.470788
A	WT	0.56622
A	WT	0.519306
A	WT	0.682973
A	WT	0.627706
A	WT	0.747238
A	WT	0.630704
A	WT	0.575166
A	WT	0.747618
A	WT	0.690173
A	WT	0.64614
A	WT	0.787118
A	WT	0.558078
A	WT	0.548506
A	WT	0.55756
A	WT	0.581374
A	WT	0.561368
A	WT	0.454006
A	WT	0.680257
A	WT	0.656607
A	WT	0.420416
A	WT	0.770683
A	WT	0.661389
A	WT	0.483502
A	WT	0.700623
A	WT	0.708341
A	WT	0.664631
A	WT	0.772783
A	WT	0.593089
A	WT	0.768978
A	WT	0.564795
A	WT	0.592232
A	WT	0.617008
A	WT	0.699091
A	WT	0.551188
A	WT	0.70242
A	WT	0.63536
A	WT	0.635556
A	WT	0.712683
A	WT	0.665747
A	WT	0.569547
A	WT	0.729244
A	WT	0.741507
A	WT	0.807255
A	WT	0.723145
A	WT	0.693511
A	WT	0.522437
A	WT	0.467936
A	WT	0.768312
A	WT	0.669569
A	WT	0.729733
A	WT	0.686427
A	WT	0.560257
A	WT	0.545792
A	WT	0.63631
A	WT	0.656339
A	WT	0.694087
A	WT	0.5373
A	WT	0.483436
A	WT	0.630208
A	WT	0.602498
A	WT	0.655627
A	WT	0.583932
A	WT	0.569716
A	WT	0.545795
A	WT	0.746433
A	WT	0.742752
A	WT	0.688347
A	WT	0.575591
A	WT	0.614021
A	WT	0.653065
A	WT	0.663698
A	WT	0.656126
A	WT	0.686611
A	WT	0.460184
A	WT	0.567115
A	WT	0.596495
A	WT	0.741458
A	WT	0.746246
A	WT	0.587669
A	WT	0.716581
A	WT	0.649561
A	WT	0.417203
A	WT	0.732083
A	WT	0.686715
A	WT	0.561368
A	WT	0.774276
A	WT	0.548977
A	WT	0.73018
A	WT	0.794057
A	WT	0.693957
A	WT	0.554973
A	WT	0.762226
A	WT	0.734699
A	WT	0.672141
A	WT	0.477793
A	WT	0.730553
A	WT	0.517492
A	WT	0.522609
A	WT	0.627642
A	WT	0.640098
A	WT	0.703925
A	WT	0.729603
A	WT	0.739641
A	WT	0.498547
A	WT	0.682186
A	WT	0.433505
A	WT	0.53994
A	WT	0.416895
A	WT	0.643429
A	WT	0.770687
A	WT	0.737071
A	WT	0.781522
A	WT	0.675739
A	WT	0.684331
A	WT	0.708797
A	WT	0.735965
A	WT	0.615209
A	WT	0.633501
A	WT	0.490329
A	WT	0.386193
A	WT	0.734873
A	WT	0.764561
A	WT	0.49085
A	WT	0.436821
A	WT	0.459439
A	WT	0.587914
A	WT	0.482111
A	WT	0.708626
A	WT	0.671009
A	WT	0.611794
A	WT	0.617194
A	WT	0.639283
A	WT	0.694757
A	WT	0.4891
A	WT	0.418918
A	WT	0.701799
A	WT	0.517847
A	WT	0.775667
A	WT	0.733616
A	WT	0.674406
A	WT	0.613808
A	WT	0.649678
A	WT	0.510096
A	WT	0.757685
A	WT	0.568655
A	WT	0.56017
A	WT	0.610939
A	WT	0.536515
A	WT	0.6436
A	WT	0.63505
A	WT	0.503501
A	WT	0.475227
A	WT	0.569259
A	WT	0.589754
A	WT	0.645123
A	WT	0.666199
A	WT	0.645471
A	WT	0.642081
A	WT	0.583883
A	WT	0.576527
A	WT	0.656598
A	WT	0.641855
A	WT	0.552944
A	WT	0.51128
A	WT	0.702519
A	WT	0.70927
A	WT	0.504851
A	WT	0.618401
A	WT	0.500222
A	WT	0.726072
A	WT	0.69896
A	WT	0.601351
A	WT	0.668415
A	WT	0.724291
A	WT	0.403307
A	WT	0.468674
A	WT	0.698758
A	WT	0.58447
A	WT	0.529204
A	WT	0.700495
A	WT	0.599421
A	WT	0.665808
A	WT	0.63706
A	WT	0.449806
A	WT	0.412105
A	WT	0.744464
A	WT	0.569619
A	WT	0.542887
A	WT	0.559183
A	WT	0.546019
A	WT	0.729222
A	WT	0.408301
A	WT	0.61268
A	WT	0.757451
A	WT	0.684183
A	WT	0.624912
A	WT	0.686738
A	WT	0.663771
A	WT	0.720201
A	WT	0.490284
A	WT	0.609737
A	WT	0.679051
A	WT	0.634831
A	WT	0.479789
A	WT	0.592479
A	WT	0.603462
A	WT	0.571791
A	WT	0.722209
A	WT	0.518465
A	WT	0.667094
A	WT	0.556903
A	WT	0.758884
A	WT	0.717204
A	WT	0.627715
A	WT	0.586036
A	WT	0.555841
A	WT	0.585655
A	WT	0.722912
A	WT	0.734973
A	WT	0.631471
A	WT	0.616609
A	WT	0.585254
A	WT	0.663993
A	WT	0.632266
A	WT	0.709717
A	WT	0.590036
A	WT	0.497264
A	WT	0.444805
A	WT	0.731311
A	WT	0.604236
A	WT	0.742842
A	WT	0.58696
A	WT	0.78129
A	WT	0.74373
A	WT	0.587105
A	WT	0.478591
A	WT	0.52365
A	WT	0.725563
A	WT	0.667635
A	WT	0.511757
A	WT	0.744011
A	WT	0.826267
A	WT	0.724229
A	WT	0.742718
A	WT	0.670907
A	WT	0.690734
A	WT	0.68023
A	WT	0.459127
A	WT	0.527361
A	WT	0.525533
A	WT	0.616788
A	WT	0.676998
A	WT	0.672161
A	WT	0.588155
A	WT	0.607149
A	WT	0.618455
A	WT	0.676711
A	WT	0.66054
A	WT	0.60613
A	WT	0.528254
A	WT	0.665515
A	WT	0.426279
A	WT	0.509321
A	WT	0.716759
A	WT	0.700025
A	WT	0.585632
A	WT	0.543016
A	WT	0.774647
A	WT	0.72788
A	WT	0.624719
A	WT	0.653667
A	WT	0.528303
A	WT	0.430436
A	WT	0.453697
A	WT	0.524335
A	WT	0.736234
A	WT	0.67046
A	WT	0.752197
A	WT	0.66764
A	WT	0.68798
A	WT	0.709842
A	WT	0.670827
A	WT	0.825783
A	WT	0.560492
A	WT	0.692638
A	WT	0.760819
A	WT	0.687774
A	WT	0.718864
A	WT	0.58718
A	WT	0.611589
A	WT	0.719699
A	WT	0.708434
A	WT	0.737857
A	WT	0.650242
A	WT	0.626222
A	WT	0.692584
A	WT	0.717335
A	WT	0.761467
A	WT	0.707582
A	WT	0.661816
A	WT	0.602831
A	WT	0.646406
A	WT	0.623441
A	WT	0.776458
A	WT	0.676753
A	WT	0.521236
A	WT	0.506938
A	WT	0.773616
A	WT	0.718197
A	WT	0.737523
A	WT	0.755698
A	WT	0.571717
A	WT	0.588946
A	WT	0.642841
A	WT	0.682769
A	WT	0.414409
A	WT	0.551064
A	WT	0.731356
A	WT	0.700692
A	WT	0.707929
A	WT	0.680892
A	WT	0.601899
A	WT	0.673866
A	WT	0.63025
A	WT	0.572705
A	WT	0.673755
A	WT	0.77361
A	WT	0.732037
A	WT	0.664214
A	WT	0.565603
A	WT	0.644071
A	WT	0.773714
A	WT	0.564448
A	WT	0.621327
A	WT	0.562786
A	WT	0.502859
A	WT	0.54143
A	WT	0.705473
A	WT	0.650916
A	WT	0.622399
A	WT	0.777839
A	WT	0.693102
A	WT	0.633839
A	WT	0.553687
A	WT	0.696694
A	WT	0.70955
A	WT	0.725107
A	WT	0.623908
A	WT	0.730057
A	WT	0.750266
A	WT	0.630232
A	WT	0.777963
A	WT	0.699511
A	WT	0.759758
A	WT	0.669195
A	WT	0.666707
A	WT	0.689296
A	WT	0.768628
A	WT	0.72448
A	WT	0.722383
A	WT	0.650273
A	WT	0.688741
A	WT	0.712588
A	WT	0.644653
A	WT	0.780283
A	WT	0.839823
A	WT	0.722407
A	WT	0.741983
A	WT	0.620989
A	WT	0.639412
A	WT	0.759825
A	WT	0.76229
A	WT	0.654021
A	WT	0.688556
A	WT	0.759323
A	WT	0.60852
A	WT	0.722996
A	WT	0.740597
A	WT	0.542109
A	WT	0.537642
A	WT	0.514437
A	WT	0.707184
A	WT	0.551255
A	WT	0.669071
A	WT	0.553014
A	WT	0.717959
A	WT	0.625499
A	WT	0.748542
A	WT	0.541962
A	WT	0.690381
A	WT	0.537913
A	WT	0.655383
A	WT	0.628989
A	WT	0.754477
A	WT	0.577773
A	WT	0.726063
A	WT	0.673569
A	WT	0.787054
A	WT	0.720557
A	WT	0.519943
A	WT	0.436304
A	WT	0.486234
A	WT	0.738202
A	WT	0.535086
A	WT	0.617164
A	WT	0.810216
A	WT	0.802117
A	WT	0.610188
A	WT	0.729853
A	WT	0.683804
A	WT	0.690869
A	WT	0.658271
A	WT	0.775285
A	WT	0.53636
A	WT	0.422013
A	WT	0.522533
A	WT	0.702276
A	WT	0.695195
A	WT	0.550146
A	WT	0.422756
A	WT	0.426882
A	WT	0.644832
A	WT	0.561493
A	WT	0.739231
A	WT	0.839817
A	WT	0.563549
A	WT	0.548974
A	WT	0.634145
A	WT	0.676714
A	WT	0.658057
A	WT	0.601657
A	WT	0.66767
A	WT	0.737976
A	WT	0.637993
A	WT	0.741144
A	WT	0.533756
A	WT	0.821933
A	WT	0.615409
A	WT	0.765816
A	WT	0.798169
A	WT	0.581266
A	WT	0.640426
A	WT	0.568009
A	WT	0.613418
A	WT	0.796349
A	WT	0.694381
A	WT	0.688469
A	WT	0.760302
A	WT	0.638128
A	WT	0.687411
A	WT	0.671631
A	WT	0.764146
A	WT	0.673244
A	WT	0.637129
A	WT	0.728521
A	WT	0.668166
A	WT	0.765012
A	WT	0.711423
A	WT	0.505911
A	WT	0.725617
A	WT	0.640745
A	WT	0.673674
A	WT	0.536208
A	WT	0.605587
A	WT	0.786983
A	WT	0.753362
A	WT	0.562537
A	WT	0.714138
A	WT	0.588555
A	WT	0.602076
A	WT	0.528395
A	WT	0.600204
A	WT	0.46797
A	WT	0.739051
A	WT	0.664788
A	WT	0.638361
A	WT	0.733521
A	WT	0.542046
A	WT	0.593538
A	WT	0.78282
A	WT	0.683987
A	WT	0.623155
A	WT	0.723129
A	WT	0.756198
A	WT	0.558516
A	WT	0.667964
A	WT	0.777369
A	WT	0.737467
A	WT	0.716937
A	WT	0.769516
A	WT	0.689383
A	WT	0.630104
A	WT	0.628212
A	WT	0.640316
A	WT	0.722074
A	WT	0.776858
A	WT	0.400915
A	WT	0.745364
A	WT	0.778424
A	WT	0.773067
A	WT	0.749785
A	WT	0.706074
A	WT	0.526136
A	WT	0.728086
A	WT	0.768789
A	WT	0.78021
A	WT	0.618668
A	WT	0.638611
A	WT	0.751592
A	WT	0.805441
A	WT	0.589375
A	WT	0.54059
A	WT	0.519011
A	WT	0.566155
A	WT	0.75321
A	WT	0.777497
A	WT	0.668156
A	WT	0.685444
A	WT	0.739714
B	WT	0.651095
B	WT	0.70841
B	WT	0.696542
B	WT	0.715057
B	WT	0.765923
B	WT	0.68952
B	WT	0.638898
B	WT	0.607227
B	WT	0.572989
B	WT	0.663926
B	WT	0.639556
B	WT	0.632443
B	WT	0.601307
B	WT	0.675636
B	WT	0.666897
B	WT	0.61132
B	WT	0.501603
B	WT	0.621329
B	WT	0.605453
B	WT	0.748215
B	WT	0.656492
B	WT	0.592093
B	WT	0.599948
B	WT	0.551221
B	WT	0.52189
B	WT	0.586387
B	WT	0.578243
B	WT	0.504568
B	WT	0.607474
B	WT	0.54462
B	WT	0.57682
B	WT	0.666955
B	WT	0.658389
B	WT	0.647254
B	WT	0.599329
B	WT	0.624875
B	WT	0.835098
B	WT	0.765428
B	WT	0.675465
B	WT	0.571857
B	WT	0.719071
B	WT	0.651902
B	WT	0.557614
B	WT	0.477438
B	WT	0.548251
B	WT	0.517383
B	WT	0.665327
B	WT	0.69522
B	WT	0.573449
B	WT	0.618255
B	WT	0.677677
B	WT	0.594944
B	WT	0.698263
B	WT	0.606385
B	WT	0.608603
B	WT	0.457954
B	WT	0.627602
B	WT	0.617866
B	WT	0.615619
B	WT	0.615827
B	WT	0.619587
B	WT	0.622023
B	WT	0.615806
B	WT	0.473786
B	WT	0.59703
B	WT	0.591723
B	WT	0.563133
B	WT	0.6548
B	WT	0.711432
B	WT	0.664919
B	WT	0.604279
B	WT	0.644596
B	WT	0.601775
B	WT	0.487474
B	WT	0.639034
B	WT	0.638765
B	WT	0.537484
B	WT	0.598632
B	WT	0.743047
B	WT	0.595026
B	WT	0.671822
B	WT	0.628589
B	WT	0.54273
B	WT	0.698293
B	WT	0.696467
B	WT	0.619493
B	WT	0.654961
B	WT	0.58431
B	WT	0.686117
B	WT	0.569487
B	WT	0.52677
B	WT	0.688899
B	WT	0.608464
B	WT	0.51451
B	WT	0.619705
B	WT	0.567257
B	WT	0.54624
B	WT	0.608879
B	WT	0.592723
B	WT	0.618856
B	WT	0.556687
B	WT	0.618737
B	WT	0.589496
B	WT	0.690226
B	WT	0.685735
B	WT	0.552878
B	WT	0.645172
B	WT	0.457812
B	WT	0.623473
B	WT	0.527861
B	WT	0.528013
B	WT	0.624358
B	WT	0.535846
B	WT	0.665616
B	WT	0.661958
B	WT	0.546594
B	WT	0.54453
B	WT	0.577548
B	WT	0.608691
B	WT	0.651133
B	WT	0.705265
B	WT	0.57952
B	WT	0.572275
B	WT	0.680376
B	WT	0.588322
B	WT	0.520874
B	WT	0.602735
B	WT	0.676986
B	WT	0.587392
B	WT	0.589192
B	WT	0.638723
B	WT	0.472845
B	WT	0.672629
B	WT	0.721291
B	WT	0.627682
B	WT	0.630893
B	WT	0.500772
B	WT	0.481587
B	WT	0.653759
B	WT	0.518276
B	WT	0.635014
B	WT	0.633754
B	WT	0.561021
B	WT	0.580891
B	WT	0.605699
B	WT	0.61659
B	WT	0.681216
B	WT	0.717788
B	WT	0.554521
B	WT	0.574178
B	WT	0.598309
B	WT	0.542319
B	WT	0.686448
B	WT	0.680598
B	WT	0.656517
B	WT	0.695861
B	WT	0.54408
B	WT	0.642497
B	WT	0.541751
B	WT	0.710719
B	WT	0.66135
B	WT	0.613194
B	WT	0.631751
B	WT	0.628179
B	WT	0.629093
B	WT	0.565866
B	WT	0.469239
B	WT	0.676678
B	WT	0.643738
B	WT	0.631782
B	WT	0.586974
B	WT	0.615806
B	WT	0.608829
B	WT	0.62478
B	WT	0.560224
B	WT	0.634452
B	WT	0.605423
B	WT	0.583032
B	WT	0.536401
B	WT	0.605254
B	WT	0.692072
B	WT	0.62853
B	WT	0.492324
B	WT	0.60385
B	WT	0.634629
B	WT	0.563297
B	WT	0.608354
B	WT	0.632575
B	WT	0.74155
B	WT	0.669019
B	WT	0.567665
B	WT	0.619487
B	WT	0.534032
B	WT	0.486313
B	WT	0.660412
B	WT	0.542223
B	WT	0.558615
B	WT	0.524901
B	WT	0.652843
B	WT	0.559944
B	WT	0.570076
B	WT	0.558037
B	WT	0.55118
B	WT	0.565508
B	WT	0.597602
B	WT	0.601435
B	WT	0.582093
B	WT	0.52309
B	WT	0.650712
B	WT	0.495671
B	WT	0.583376
B	WT	0.644621
B	WT	0.624839
B	WT	0.455373
B	WT	0.58776
B	WT	0.477662
B	WT	0.523407
B	WT	0.690814
B	WT	0.731315
B	WT	0.63327
B	WT	0.484942
B	WT	0.595143
B	WT	0.567574
B	WT	0.615784
B	WT	0.550613
B	WT	0.486134
B	WT	0.592425
B	WT	0.564775
B	WT	0.611556
B	WT	0.617672
B	WT	0.632263
B	WT	0.49801
B	WT	0.571516
B	WT	0.724946
B	WT	0.50175
B	WT	0.583412
B	WT	0.628073
B	WT	0.630982
B	WT	0.670955
B	WT	0.601621
B	WT	0.732632
B	WT	0.571531
B	WT	0.503869
B	WT	0.68346
B	WT	0.606941
B	WT	0.633001
B	WT	0.704008
B	WT	0.629674
B	WT	0.622976
B	WT	0.580593
B	WT	0.638706
B	WT	0.659878
B	WT	0.669159
B	WT	0.479537
B	WT	0.564792
B	WT	0.631391
B	WT	0.522903
B	WT	0.73618
B	WT	0.583777
B	WT	0.64883
B	WT	0.511022
B	WT	0.669524
B	WT	0.603965
B	WT	0.506211
B	WT	0.600707
B	WT	0.616134
B	WT	0.533064
B	WT	0.639283
B	WT	0.715528
B	WT	0.722738
B	WT	0.648439
B	WT	0.645895
B	WT	0.583558
B	WT	0.566621
B	WT	0.53596
B	WT	0.596349
B	WT	0.610501
B	WT	0.526586
B	WT	0.659412
B	WT	0.52694
B	WT	0.590989
B	WT	0.624972
B	WT	0.610726
B	WT	0.781525
B	WT	0.703954
B	WT	0.659837
B	WT	0.667652
B	WT	0.620856
B	WT	0.504381
B	WT	0.643308
B	WT	0.666672
B	WT	0.623803
B	WT	0.604498
B	WT	0.569501
B	WT	0.616408
B	WT	0.50931
B	WT	0.675188
B	WT	0.651073
B	WT	0.564723
B	WT	0.554321
B	WT	0.576056
B	WT	0.668177
B	WT	0.522635
B	WT	0.641249
B	WT	0.60036
B	WT	0.609005
B	WT	0.595879
B	WT	0.627911
B	WT	0.607711
B	WT	0.58996
B	WT	0.611073
B	WT	0.76052
B	WT	0.629216
B	WT	0.641346
B	WT	0.692787
B	WT	0.554665
B	WT	0.574958
B	WT	0.547597
B	WT	0.695804
B	WT	0.738384
B	WT	0.577765
B	WT	0.522873
B	WT	0.634023
B	WT	0.685682
B	WT	0.692731
B	WT	0.550828
B	WT	0.52672
B	WT	0.554345
B	WT	0.537533
B	WT	0.595866
B	WT	0.575666
B	WT	0.68717
B	WT	0.536326
B	WT	0.581617
B	WT	0.656201
B	WT	0.562668
B	WT	0.580744
B	WT	0.553686
B	WT	0.652001
B	WT	0.559874
B	WT	0.624769
B	WT	0.670166
B	WT	0.498778
B	WT	0.565847
B	WT	0.576298
B	WT	0.538948
B	WT	0.618712
B	WT	0.635072
B	WT	0.520874
B	WT	0.596422
B	WT	0.590777
B	WT	0.577517
B	WT	0.482092
B	WT	0.631237
B	WT	0.539528
B	WT	0.592179
B	WT	0.57583
B	WT	0.582533
B	WT	0.548666
B	WT	0.680249
C	WT	0.73662
C	WT	0.756616
C	WT	0.751912
C	WT	0.787159
C	WT	0.74836
C	WT	0.689072
C	WT	0.648624
C	WT	0.721628
C	WT	0.79572
C	WT	0.798102
C	WT	0.698285
C	WT	0.680397
C	WT	0.700403
C	WT	0.776712
C	WT	0.783801
C	WT	0.603075
C	WT	0.558926
C	WT	0.571365
C	WT	0.702417
C	WT	0.689914
C	WT	0.640162
C	WT	0.682535
C	WT	0.776429
C	WT	0.53802
C	WT	0.566259
C	WT	0.651203
C	WT	0.625937
C	WT	0.691106
C	WT	0.698703
C	WT	0.685237
C	WT	0.653181
C	WT	0.645231
C	WT	0.681828
C	WT	0.496604
C	WT	0.557404
C	WT	0.626316
C	WT	0.704579
C	WT	0.591439
C	WT	0.513333
C	WT	0.794419
C	WT	0.7211
C	WT	0.763685
C	WT	0.775759
C	WT	0.818138
C	WT	0.558076
C	WT	0.703097
C	WT	0.775785
C	WT	0.743372
C	WT	0.718261
C	WT	0.751705
C	WT	0.705967
C	WT	0.704675
C	WT	0.689673
C	WT	0.671374
C	WT	0.669605
C	WT	0.766523
C	WT	0.767465
C	WT	0.754839
C	WT	0.54633
C	WT	0.756239
C	WT	0.730559
C	WT	0.645418
C	WT	0.543692
C	WT	0.769829
C	WT	0.769991
C	WT	0.73174
C	WT	0.716404
C	WT	0.808299
C	WT	0.792049
C	WT	0.697062
C	WT	0.66238
C	WT	0.770633
C	WT	0.654908
C	WT	0.767783
C	WT	0.814651
C	WT	0.636454
C	WT	0.640542
C	WT	0.733825
C	WT	0.736721
C	WT	0.727888
C	WT	0.756219
C	WT	0.66919
C	WT	0.675342
C	WT	0.772738
C	WT	0.803296
C	WT	0.746895
C	WT	0.682912
C	WT	0.587567
C	WT	0.600257
C	WT	0.694256
C	WT	0.789493
C	WT	0.684248
C	WT	0.67471
C	WT	0.784772
C	WT	0.627856
C	WT	0.627524
C	WT	0.718937
C	WT	0.760557
C	WT	0.793418
C	WT	0.542666
C	WT	0.543003
C	WT	0.762198
C	WT	0.717457
C	WT	0.603586
C	WT	0.685026
C	WT	0.753636
C	WT	0.645946
C	WT	0.796114
C	WT	0.689648
C	WT	0.661885
C	WT	0.652527
C	WT	0.706779
C	WT	0.711957
C	WT	0.666951
C	WT	0.672991
C	WT	0.738305
C	WT	0.645365
C	WT	0.673882
C	WT	0.967607
C	WT	0.804616
C	WT	0.625427
C	WT	0.725788
C	WT	0.739597
C	WT	0.757932
C	WT	0.691861
C	WT	0.616769
C	WT	0.544909
C	WT	0.77276
C	WT	0.716213
C	WT	0.743915
C	WT	0.597919
C	WT	0.694782
C	WT	0.754549
C	WT	0.675896
C	WT	0.743977
C	WT	0.783674
C	WT	0.671869
C	WT	0.724296
C	WT	0.689241
C	WT	0.689676
C	WT	0.675196
C	WT	0.707291
C	WT	0.768486
C	WT	0.706577
C	WT	0.68651
C	WT	0.764928
C	WT	0.690218
C	WT	0.701897
C	WT	0.748946
C	WT	0.699743
C	WT	0.662463
C	WT	0.74705
C	WT	0.715146
C	WT	0.598709
C	WT	0.597292
C	WT	0.638148
C	WT	0.75455
C	WT	0.681965
C	WT	0.764831
C	WT	0.72107
C	WT	0.680478
C	WT	0.706291
C	WT	0.659796
C	WT	0.491605
C	WT	0.726995
C	WT	0.666494
C	WT	0.591573
C	WT	0.625124
C	WT	0.68805
C	WT	0.786329
C	WT	0.731358
C	WT	0.51754
C	WT	0.736599
C	WT	0.68726
C	WT	0.590059
C	WT	0.752333
C	WT	0.716922
C	WT	0.418215
C	WT	0.634486
C	WT	0.701328
C	WT	0.774469
C	WT	0.631761
C	WT	0.780285
C	WT	0.719074
C	WT	0.674769
C	WT	0.534018
C	WT	0.66672
C	WT	0.747775
C	WT	0.780017
C	WT	0.875554
C	WT	0.609555
C	WT	0.666821
C	WT	0.660263
C	WT	0.682665
C	WT	0.545186
C	WT	0.73747
C	WT	0.620542
C	WT	0.6179
C	WT	0.73173
C	WT	0.691462
C	WT	0.75289
C	WT	0.710909
C	WT	0.758978
C	WT	0.664808
C	WT	0.586123
C	WT	0.585193
C	WT	0.654481
C	WT	0.711955
C	WT	0.680169
C	WT	0.602665
C	WT	0.745586
C	WT	0.744568
C	WT	0.619102
C	WT	0.774142
C	WT	0.644129
C	WT	0.691028
C	WT	0.738145
C	WT	0.627638
C	WT	0.734847
C	WT	0.681399
C	WT	0.743641
C	WT	0.782497
C	WT	0.6097
C	WT	0.637677
C	WT	0.518646
C	WT	0.770227
C	WT	0.610278
C	WT	0.694705
C	WT	0.64448
C	WT	0.76608
C	WT	0.63667
C	WT	0.669355
C	WT	0.782869
C	WT	0.705144
C	WT	0.660438
C	WT	0.669837
C	WT	0.689807
C	WT	0.639719
C	WT	0.693854
C	WT	0.582896
C	WT	0.754049
C	WT	0.805879
C	WT	0.695714
C	WT	0.754918
C	WT	0.731091
C	WT	0.597046
C	WT	0.659687
C	WT	0.629224
C	WT	0.72761
C	WT	0.650257
C	WT	0.804291
C	WT	0.643094
C	WT	0.728913
C	WT	0.659291
C	WT	0.68801
C	WT	0.610648
C	WT	0.746663
C	WT	0.591466
C	WT	0.780057
C	WT	0.78708
C	WT	0.700444
C	WT	0.719735
C	WT	0.748607
C	WT	0.660784
C	WT	0.716561
C	WT	0.678913
C	WT	0.737168
C	WT	0.631437
C	WT	0.523941
C	WT	0.618517
C	WT	0.783513
C	WT	0.780281
C	WT	0.678596
C	WT	0.627431
C	WT	0.644492
C	WT	0.808983
C	WT	0.671947
C	WT	0.544193
C	WT	0.739329
C	WT	0.788073
C	WT	0.809343
C	WT	0.715116
C	WT	0.633914
C	WT	0.612125
C	WT	0.690186
C	WT	0.702845
C	WT	0.728646
C	WT	0.679594
C	WT	0.697799
C	WT	0.603928
C	WT	0.632641
C	WT	0.658942
C	WT	0.691518
C	WT	0.676966
C	WT	0.63043
C	WT	0.699549
C	WT	0.734116
C	WT	0.712263
C	WT	0.850523
C	WT	0.751842
C	WT	0.835373
C	WT	0.668261
C	WT	0.682918
C	WT	0.754745
C	WT	0.581658
C	WT	0.714501
C	WT	0.580353
C	WT	0.836265
C	WT	0.742017
C	WT	0.779456
C	WT	0.664369
C	WT	0.685378
C	WT	0.712101
C	WT	0.704034
C	WT	0.733275
C	WT	0.753988
C	WT	0.770776
C	WT	0.611657
C	WT	0.800153
C	WT	0.57359
C	WT	0.633122
C	WT	0.77775
C	WT	0.76792
C	WT	0.793666
C	WT	0.740945
C	WT	0.738661
C	WT	0.651453
C	WT	0.705346
C	WT	0.637169
C	WT	0.670648
C	WT	0.559207
C	WT	0.775998
C	WT	0.614107
C	WT	0.70156
C	WT	0.681287
C	WT	0.82415
C	WT	0.665336
C	WT	0.714369
C	WT	0.729487
C	WT	0.788744
C	WT	0.803201
C	WT	0.681367
C	WT	0.625169
C	WT	0.652974
C	WT	0.689165
C	WT	0.735992
C	WT	0.716007
C	WT	0.791625
C	WT	0.702998
C	WT	0.753634
C	WT	0.745507
C	WT	0.646357
C	WT	0.724368
C	WT	0.68332
C	WT	0.578338
C	WT	0.667127
C	WT	0.776897
C	WT	0.81214
C	WT	0.757268
C	WT	0.721503
C	WT	0.696715
C	WT	0.763576
C	WT	0.752851
C	WT	0.648917
C	WT	0.696039
C	WT	0.661114
C	WT	0.727196
C	WT	0.739184
C	WT	0.790139
C	WT	0.586861
C	WT	0.663543
C	WT	0.770167
C	WT	0.675267
C	WT	0.600842
C	WT	0.721282
C	WT	0.595497
C	WT	0.662739
C	WT	0.620667
C	WT	0.739896
C	WT	0.780621
C	WT	0.779757
C	WT	0.88416
C	WT	0.735113
C	WT	0.660718
C	WT	0.697852
C	WT	0.579231
C	WT	0.638672
C	WT	0.691216
C	WT	0.712877
C	WT	0.701272
C	WT	0.632394
C	WT	0.734817
C	WT	0.817863
C	WT	0.718834
C	WT	0.767307
C	WT	0.725043
C	WT	0.875057
C	WT	0.784966
C	WT	0.643893
C	WT	0.596668
C	WT	0.674704
C	WT	0.738075
C	WT	0.703428
C	WT	0.724719
C	WT	0.712269
C	WT	0.704876
C	WT	0.654218
C	WT	0.729147
C	WT	0.767839
C	WT	0.613732
C	WT	0.690596
C	WT	0.732586
C	WT	0.626938
C	WT	0.575013
C	WT	0.641259
C	WT	0.696518
C	WT	0.717171
C	WT	0.769211
C	WT	0.668991
C	WT	0.648703
C	WT	0.689164
C	WT	0.630675
C	WT	0.783834
C	WT	0.657289
C	WT	0.63391
C	WT	0.700635
C	WT	0.736618
C	WT	0.764823
C	WT	0.742856
C	WT	0.671349
C	WT	0.643389
C	WT	0.687918
C	WT	0.69731
C	WT	0.644562
C	WT	0.517754
C	WT	0.774629
C	WT	0.786849
C	WT	0.77039
C	WT	0.708151
C	WT	0.724423
C	WT	0.721877
C	WT	0.7349
C	WT	0.720325
C	WT	0.578887
C	WT	0.720594
C	WT	0.712461
C	WT	0.640494
C	WT	0.756902
C	WT	0.786821
C	WT	0.860922
C	WT	0.826366
C	WT	0.684478
C	WT	0.799948
C	WT	0.767095
C	WT	0.780202
C	WT	0.608356
C	WT	0.649574
C	WT	0.64912
C	WT	0.723808
C	WT	0.567241
C	WT	0.775507
C	WT	0.787391
C	WT	0.656403
C	WT	0.637146
C	WT	0.629509
C	WT	0.613096
C	WT	0.821296
C	WT	0.69226
C	WT	0.620758
C	WT	0.732301
C	WT	0.760968
C	WT	0.70445
C	WT	0.739909
C	WT	0.783352
C	WT	0.746729
C	WT	0.687818
C	WT	0.7298
C	WT	0.65811
C	WT	0.686411
C	WT	0.7676
C	WT	0.753222
C	WT	0.742879
C	WT	0.774619
C	WT	0.777356
C	WT	0.595363
C	WT	0.739141
C	WT	0.670856
C	WT	0.721008
C	WT	0.74283
C	WT	0.694021
C	WT	0.696443
C	WT	0.74822
C	WT	0.706606
C	WT	0.750288
C	WT	0.769227
C	WT	0.756228
C	WT	0.566286
C	WT	0.77075
C	WT	0.695984
C	WT	0.739482
C	WT	0.696636
C	WT	0.787469
C	WT	0.63073
C	WT	0.686266
C	WT	0.820136
C	WT	0.751982
C	WT	0.727729
C	WT	0.706489
C	WT	0.749921
C	WT	0.76392
C	WT	0.690179
C	WT	0.735194
C	WT	0.706909
C	WT	0.743115
C	WT	0.724015
C	WT	0.672171
C	WT	0.791352
C	WT	0.627063
C	WT	0.821325
C	WT	0.799496
C	WT	0.771968
C	WT	0.739091
C	WT	0.771287
C	WT	0.678854
C	WT	0.609498
C	WT	0.585601
C	WT	0.725298
C	WT	0.709602
C	WT	0.609384
C	WT	0.652531
C	WT	0.722965
C	WT	0.691878
C	WT	0.707686
C	WT	0.689633
C	WT	0.518463
C	WT	0.764501
C	WT	0.571041
C	WT	0.765593
C	WT	0.649001
C	WT	0.762388
C	WT	0.708474
C	WT	0.77375
C	WT	0.757862
C	WT	0.750906
C	WT	0.750454
C	WT	0.715492
C	WT	0.641646
C	WT	0.570731
[truncated: 9,447 more rows]
